# Supplementary material for: Phosphine-Functionalized Core-Crosslinked Micelles and Nanogels with an Anionic Poly(styrenesulfonate) Shell: Synthesis, Rhodium(I) Coordination and Aqueous Biphasic Hydrogenation Catalysis
Source: MDPI journal article supplement (doi:10.3390/polym14224937), 2022-11-15
Supplement: s1 [file s1]

## SUPPORTING INFORMATION

### Index

|                                                                                                                                                                                                                                                                                                                                                                                                                                                                                                               |     |
|---------------------------------------------------------------------------------------------------------------------------------------------------------------------------------------------------------------------------------------------------------------------------------------------------------------------------------------------------------------------------------------------------------------------------------------------------------------------------------------------------------------|-----|
| <b>(a) TPP-functionalized CCMs and NGs with P(SS<sup>-</sup>Na<sup>+</sup>) homopolymer blocks in the hydrophilic shell</b>                                                                                                                                                                                                                                                                                                                                                                                   | S4  |
| Table S 1. List of all polymers with P(SS <sup>-</sup> Na <sup>+</sup> ) shell synthesized in this study and reference to their characterization.                                                                                                                                                                                                                                                                                                                                                             | S4  |
| Figure S 1. <sup>1</sup> H NMR monitoring of the St/DPPS copolymerization for the chain extension of R <sub>0</sub> -(SS <sup>-</sup> Na <sup>+</sup> ) <sub>140</sub> -b-St <sub>50</sub> -SC(S)SnPr to yield R <sub>0</sub> -(SS <sup>-</sup> Na <sup>+</sup> ) <sub>140</sub> -b-St <sub>50</sub> -b-(St <sub>1-y-co-DPPS<sub>y</sub>)<sub>300</sub>-SC(S)SnPr.</sub>                                                                                                                                      | S5  |
| Figure S 2. <sup>1</sup> H NMR monitoring of the St/DPPS copolymerization for the chain extension of R <sub>0</sub> -(SS <sup>-</sup> Na <sup>+</sup> ) <sub>140</sub> -SC(S)SnPr to yield R <sub>0</sub> -(SS <sup>-</sup> Na <sup>+</sup> ) <sub>140</sub> -b-(St <sub>1-y-co-DPPS<sub>y</sub>)<sub>300</sub>-SC(S)SnPr.</sub>                                                                                                                                                                              | S6  |
| Figure S 3. DLS and TEM characterization of the amphiphilic di(tri)-block copolymers, R <sub>0</sub> -(SS <sup>-</sup> Na <sup>+</sup> ) <sub>140</sub> -b-St <sub>x</sub> -b-(St <sub>1-y-co-DPPS<sub>y</sub>)<sub>300</sub>-SC(S)SnPr (x,y = 50,0.20; 0,0.05; 0,0.10; 0,0.20).</sub>                                                                                                                                                                                                                        | S7  |
| Figure S 4. <sup>1</sup> H and <sup>31</sup> P NMR spectra of (a) R <sub>0</sub> -(SS <sup>-</sup> Na <sup>+</sup> ) <sub>140</sub> -b-(St <sub>0.8-co-DPPS<sub>0.2</sub>)<sub>300</sub>-SC(S)SnPr and (b) R<sub>0</sub>-(SS<sup>-</sup>Na<sup>+</sup>)<sub>140</sub>-b-St<sub>50</sub>-b-(St<sub>0.8-co-DPPS<sub>0.2</sub>)<sub>300</sub>-SC(S)SnPr latexes in D<sub>2</sub>O/CDCl<sub>3</sub> (3:1 v/v).</sub></sub>                                                                                        | S8  |
| Figure S 5. <sup>1</sup> H NMR monitoring of the St/DEGDMA copolymerization for the crosslinking of R <sub>0</sub> -(SS <sup>-</sup> Na <sup>+</sup> ) <sub>140</sub> -b-St <sub>50</sub> -b-(St <sub>1-y-co-DPPS<sub>y</sub>)<sub>300</sub>-SC(S)SnPr to yield the CCMs R<sub>0</sub>-(SS<sup>-</sup>Na<sup>+</sup>)<sub>140</sub>-b-St<sub>50</sub>-b-(St<sub>1-y-co-DPPS<sub>y</sub>)<sub>300</sub>-b-(St<sub>0.9-co-DEGDMA<sub>0.1</sub>)<sub>150</sub>-SC(S)SnPr (y = 0.05, 0.1, 0.2).</sub></sub></sub> | S9  |
| Figure S 6. Comparison of unfiltered and filtered DLS traces of the aqueous dispersions of the CCMs R <sub>0</sub> -(SS <sup>-</sup> Na <sup>+</sup> ) <sub>140</sub> -b-St <sub>50</sub> -b-(St <sub>0.95-co-DPPS<sub>0.05</sub>)<sub>300</sub>-b-(St<sub>0.90-co-DEGDMA<sub>0.10</sub>)<sub>150</sub>-SC(S)SnPr.</sub></sub>                                                                                                                                                                                | S10 |
| Figure S 7. Comparison of unfiltered and filtered DLS traces of the aqueous dispersions of the CCMs R <sub>0</sub> -(SS <sup>-</sup> Na <sup>+</sup> ) <sub>140</sub> -b-St <sub>50</sub> -b-(St <sub>0.90-co-DPPS<sub>0.10</sub>)<sub>300</sub>-b-(St<sub>0.90-co-DEGDMA<sub>0.10</sub>)<sub>150</sub>-SC(S)SnPr.</sub></sub>                                                                                                                                                                                | S11 |
| Figure S 8. Comparison of unfiltered and filtered DLS traces of the aqueous dispersions of the CCMs R <sub>0</sub> -(SS <sup>-</sup> Na <sup>+</sup> ) <sub>140</sub> -b-St <sub>50</sub> -b-(St <sub>0.80-co-DPPS<sub>0.20</sub>)<sub>300</sub>-b-(St<sub>0.90-co-DEGDMA<sub>0.10</sub>)<sub>150</sub>-SC(S)SnPr.</sub></sub>                                                                                                                                                                                | S12 |
| Figure S 9. <sup>1</sup> H and <sup>31</sup> P NMR spectra of R <sub>0</sub> -(SS <sup>-</sup> Na <sup>+</sup> ) <sub>140</sub> -b-St <sub>50</sub> -b-(St <sub>1-y-co-DPPS<sub>y</sub>)<sub>300</sub>-b-(St<sub>0.9-co-DEGDMA<sub>0.1</sub>)<sub>150</sub>-SC(S)SnPr latexes (y = 0.05, 0.1, 0.2) in D<sub>2</sub>O/CDCl<sub>3</sub> (3:1 v/v).</sub></sub>                                                                                                                                                  | S13 |
| Figure S 10. <sup>1</sup> H NMR monitoring of the DEGDMA polymerization for the crosslinking of R <sub>0</sub> -(SS <sup>-</sup> Na <sup>+</sup> ) <sub>140</sub> -b-(St <sub>1-y-co-DPPS<sub>y</sub>)<sub>300</sub>-SC(S)SnPr to yield the CCMs R<sub>0</sub>-</sub>                                                                                                                                                                                                                                         | S14 |

|                                                                                                                                                                                          |     |
|------------------------------------------------------------------------------------------------------------------------------------------------------------------------------------------|-----|
| $(SS^-Na^+)_{140}-b-(St_{1-y}-co-DPPS_y)_{300}-b-DEGDMA_{15}-SC(S)SnPr$ ( $y = 0.05, 0.1, 0.2, 0.25$ ).                                                                                  |     |
| Figure S 11. $^1H$ and $^{31}P$ NMR spectra of $R_0-(SS^-Na^+)_{140}-b-(St_{1-y}-co-DPPS_y)-b-DEGDMA_{15}-SC(S)SnPr$ latexes ( $y = 0.05, 0.1, 0.2, 0.25$ ) in $D_2O/CDCl_3$ (3:1 v/v).  | S15 |
| Figure S 12. Comparison of unfiltered and filtered DLS traces of the aqueous dispersions of the CCMs $R_0-(SS^-Na^+)_{140}-b-(St_{0.95}-co-DPPS_{0.05})_{300}-b-DEGDMA_{15}-SC(S)SnPr$ . | S16 |
| Figure S 13. Comparison of unfiltered and filtered DLS traces of the aqueous dispersions of the CCMs $R_0-(SS^-Na^+)_{140}-b-(St_{0.90}-co-DPPS_{0.10})_{300}-b-DEGDMA_{15}-SC(S)SnPr$ . | S17 |
| Figure S 14. Comparison of unfiltered and filtered DLS traces of the aqueous dispersions of the CCMs $R_0-(SS^-Na^+)_{140}-b-(St_{0.80}-co-DPPS_{0.20})_{300}-b-DEGDMA_{15}-SC(S)SnPr$ . | S18 |
| Figure S 15. Comparison of unfiltered and filtered DLS traces of the aqueous dispersions of the CCMs $R_0-(SS^-Na^+)_{140}-b-(St_{0.80}-co-DPPS_{0.20})_{300}-b-DEGDMA_{15}-SC(S)SnPr$ . | S19 |
| Figure S 16. NMR data for the synthesis of the NGs $R_0-(SS^-Na^+)_{140}-b-St_x-b-(Sty-co-DPPS_z-co-DEGDMA_{15})-SC(S)SnPr$ ( $x,y,z = 0,285,15; 50,425,30$ ).                           | S20 |
| Figure S 17. Comparison of unfiltered and filtered DLS traces of the aqueous dispersions of the NG $R_0-(SS^-Na^+)_{140}-b-(St_{285}-co-DPPS_{15}-co-DEGDMA_{15})-SC(S)SnPr$ .           | S21 |
| Figure S 18. Comparison of unfiltered and filtered DLS traces of the aqueous dispersions of the NG $R_0-(SS^-Na^+)_{140}-b-St_{50}-b-(St_{425}-co-DPPS_{30}-co-DEGDMA_{15})-SC(S)SnPr$ . | S22 |
| Figure S 19. Photos of the CCM and NG polymer latexes after treatment with a toluene solution of $[RhCl(COD)]_2$ ( $P/Rh = 1:1$ ).                                                       | S22 |
| <b>(b) <math>^1H</math> NMR investigations of the Rh-sulfonate interaction</b>                                                                                                           | S23 |
| Figure S 20. $^1H$ NMR spectrum of the $[RhCl(COD)]_2/NaO_3SC_6H_4-4-CH_3$ interaction ( $Rh/sulfonate = ca. 1:5$ ) in $DMSO-d_6/D_2O$ (4:1 v/v).                                        | S23 |
| Figure S 21. $^1H$ NMR spectrum of the $[RhCl(COD)(PPh_3)]/NaO_3SC_6H_4-4-CH_3$ interaction ( $Rh/sulfonate = ca. 1:5$ ) in $DMSO-d_6/D_2O$ (4:1 v/v).                                   | S24 |
| Figure S 22. $^1H$ NMR spectrum of the $[RhCl(COD)]_2/R_0-(SS^-Na^+)_{140}-SC(S)SnPr$ interaction ( $Rh/sulfonate = ca. 1:5$ ) in $DMSO-d_6/D_2O$ (6:1 v/v).                             | S25 |
| Figure S 23. $^1H$ NMR spectrum of the $[RhCl(COD)(PPh_3)]/R_0-(SS^-Na^+)_{140}-SC(S)SnPr$ interaction ( $Rh/sulfonate = ca. 1:5$ ) in $DMSO-d_6/D_2O$ (6:1 v/v).                        | S26 |
| <b>(c) TPP-functionalized CCMs and NGs with <math>P(SS^-Na^+-co-PEOMA)</math> copolymer blocks in the hydrophilic shell</b>                                                              | S27 |
| Table S 2. List of all polymers with $P(SS^-Na^+-co-PEOMA)$ shell synthesized in this study and reference to their characterization.                                                     | S27 |
| Figure S 24. $^1H$ NMR monitoring of the $SS^-Na^+/PEOMA$ copolymerization for the synthesis of the $R_0-[(SS^-Na^+)_{0.2}-co-PEOMA_{0.8}]_{140}-SC(S)SnPr$ macroRAFT agents.            | S28 |
| Figure S 25. $^1H$ NMR and SEC monitoring of the $SS^-Na^+/PEOMA$ RAFT copolymerization.                                                                                                 | S29 |

|                                                                                                                                                                                                                                                                                                                                                                                                                                                                                                                                                                                                                                                   |     |
|---------------------------------------------------------------------------------------------------------------------------------------------------------------------------------------------------------------------------------------------------------------------------------------------------------------------------------------------------------------------------------------------------------------------------------------------------------------------------------------------------------------------------------------------------------------------------------------------------------------------------------------------------|-----|
| Figure S 26. DLS (left, unfiltered) and TEM (right) characterization of R <sub>0</sub> -[(SS <sup>-</sup> Na <sup>+</sup> ) <sub>0.2</sub> - <i>co</i> -PEOMA <sub>0.8</sub> ] <sub>x</sub> -SC(S)SnPr (x = 50, 140).                                                                                                                                                                                                                                                                                                                                                                                                                             | S30 |
| Figure S 27. <sup>1</sup> H NMR spectra of R <sub>0</sub> -[(SS <sup>-</sup> Na <sup>+</sup> ) <sub>0.2</sub> - <i>co</i> -PEOMA <sub>0.8</sub> ] <sub>x</sub> -SC(S)SnPr.                                                                                                                                                                                                                                                                                                                                                                                                                                                                        | S31 |
| Figure S 28. DLS and TEM characterization of R <sub>0</sub> -[(SS <sup>-</sup> Na <sup>+</sup> ) <sub>0.2</sub> - <i>co</i> -PEOMA <sub>0.8</sub> ] <sub>x</sub> - <i>b</i> -St <sub>50</sub> -SC(S)SnPr (x = 50, 140).                                                                                                                                                                                                                                                                                                                                                                                                                           | S32 |
| Figure S 29. NMR data for the synthesis of the R <sub>0</sub> -[(SS <sup>-</sup> Na <sup>+</sup> ) <sub>0.2</sub> - <i>co</i> -PEOMA <sub>0.8</sub> ] <sub>x</sub> - <i>b</i> -(St <sub>0.9</sub> - <i>co</i> -DPPS <sub>0.1</sub> ) <sub>300</sub> -SC(S)SnPr diblock copolymer (x = 50, 140).                                                                                                                                                                                                                                                                                                                                                   | S33 |
| Figure S 30. DLS (left, unfiltered) and TEM (right) characterization of R <sub>0</sub> -[(SS <sup>-</sup> Na <sup>+</sup> ) <sub>0.2</sub> - <i>co</i> -PEOMA <sub>0.8</sub> ] <sub>50</sub> - <i>b</i> -(St <sub>0.9</sub> - <i>co</i> -DPPS <sub>0.1</sub> ) <sub>300</sub> -SC(S)SnPr.                                                                                                                                                                                                                                                                                                                                                         | S33 |
| Figure S 31. NMR data for the synthesis of the R <sub>0</sub> -[(SS <sup>-</sup> Na <sup>+</sup> ) <sub>0.2</sub> - <i>co</i> -PEOMA <sub>0.8</sub> ] <sub>x</sub> - <i>b</i> -(St <sub>0.9</sub> - <i>co</i> -DPPS <sub>0.1</sub> ) <sub>300</sub> - <i>b</i> -(St <sub>0.9</sub> - <i>co</i> -DEGDMA <sub>0.1</sub> ) <sub>150</sub> -SC(S)SnPr CCMs (x = 50, 140).                                                                                                                                                                                                                                                                             | S34 |
| Figure S 32. NMR data for the synthesis of the R <sub>0</sub> -[(SS <sup>-</sup> Na <sup>+</sup> ) <sub>0.2</sub> - <i>co</i> -PEOMA <sub>0.8</sub> ] <sub>50</sub> - <i>b</i> -(St <sub>0.9</sub> - <i>co</i> -DPPS <sub>0.1</sub> ) <sub>300</sub> - <i>b</i> -DEGDMA <sub>90</sub> -SC(S)SnPr CCM.                                                                                                                                                                                                                                                                                                                                             | S35 |
| Figure S 33. NMR data for the synthesis of the R <sub>0</sub> -[(SS <sup>-</sup> Na <sup>+</sup> ) <sub>0.2</sub> - <i>co</i> -PEOMA <sub>0.8</sub> ] <sub>50</sub> - <i>b</i> -St <sub>50</sub> - <i>b</i> -(St <sub>425</sub> - <i>co</i> -DPPS <sub>30</sub> - <i>co</i> -DEGDMA <sub>15</sub> )-SC(S)SnPr NGs.                                                                                                                                                                                                                                                                                                                                | S36 |
| Figure S 34. DLS and TEM characterization of the R <sub>0</sub> -[(SS <sup>-</sup> Na <sup>+</sup> ) <sub>0.2</sub> - <i>co</i> -PEOMA <sub>0.8</sub> ] <sub>50</sub> - <i>b</i> -St <sub>50</sub> - <i>b</i> -(St <sub>425</sub> - <i>co</i> -DPPS <sub>30</sub> - <i>co</i> -DEGDMA <sub>15</sub> )-SC(S)SnPr NGs.                                                                                                                                                                                                                                                                                                                              | S36 |
| Figure S 35. DLS characterization of (a) the R <sub>0</sub> -(SS <sup>-</sup> Na <sup>+</sup> ) <sub>0.2</sub> - <i>co</i> -PEOMA <sub>0.8</sub> ] <sub>50</sub> - <i>b</i> -(St <sub>0.9</sub> - <i>co</i> -DPPS <sub>0.1</sub> ) <sub>300</sub> -SC(S)SPr diblock copolymer and (b) the corresponding R <sub>0</sub> -(SS <sup>-</sup> Na <sup>+</sup> ) <sub>0.2</sub> - <i>co</i> -PEOMA <sub>0.8</sub> ] <sub>50</sub> - <i>b</i> -(St <sub>0.9</sub> - <i>co</i> -DPPS <sub>0.1</sub> ) <sub>300</sub> - <i>b</i> -(St <sub>0.9</sub> - <i>co</i> -DEGDMA <sub>0.1</sub> ) <sub>150</sub> -SC(S)SPr CCM in a THF-water 60:40 mixed solvent. | S37 |
| Table S 3. Hydrogenation of neat styrene with the [RhCl(COD)(TPP)] precatalyst embedded in CCM nanoreactors                                                                                                                                                                                                                                                                                                                                                                                                                                                                                                                                       | S38 |
| Figure S 36. Recovered reaction mixtures after the recycling runs of Table 1 (entry 1).                                                                                                                                                                                                                                                                                                                                                                                                                                                                                                                                                           | S39 |
| Figure S 37. Recovered reaction mixtures after the catalytic runs of Table 1. (a) Entry 6. (b) Entry 7.                                                                                                                                                                                                                                                                                                                                                                                                                                                                                                                                           | S39 |
| Figure S 38. DLS of the recovered organic phase from the recycling experiments of Table 1, measured after dilution in Et <sub>2</sub> O without filtration.                                                                                                                                                                                                                                                                                                                                                                                                                                                                                       | S40 |

(a) TPP-functionalized CCMs and NGs with P(SS<sup>-</sup>Na<sup>+</sup>) homopolymer blocks in the hydrophilic shell

**Table S 1.** List of all polymers with a P(SS<sup>-</sup>Na<sup>+</sup>) shell synthesized in this study and reference to their characterization.

| Formula <sup>a</sup>                                                                                                                                                                                                                | SEC | <sup>1</sup> H NMR         | <sup>31</sup> P NMR | DLS                     | TEM                     | ζ (mV)    |
|-------------------------------------------------------------------------------------------------------------------------------------------------------------------------------------------------------------------------------------|-----|----------------------------|---------------------|-------------------------|-------------------------|-----------|
| <b>1. Diblock PSS<sup>-</sup>Na<sup>+</sup>-co-P(St-co-DPPS) micelles</b>                                                                                                                                                           |     |                            |                     |                         |                         |           |
| R <sub>0</sub> -(PSS <sup>-</sup> Na <sup>+</sup> ) <sub>140</sub> -b-St <sub>50</sub> -b-(St <sub>0.95</sub> -co-DPPS <sub>0.05</sub> ) <sub>300</sub> -SC(S)SnPr                                                                  | /   | Figure S 1                 |                     | /                       | /                       | /         |
| R <sub>0</sub> -(PSS <sup>-</sup> Na <sup>+</sup> ) <sub>140</sub> -b-St <sub>50</sub> -b-(St <sub>0.9</sub> -co-DPPS <sub>0.1</sub> ) <sub>300</sub> -SC(S)SnPr                                                                    | /   | Figure S 1                 |                     | /                       | /                       | /         |
| R <sub>0</sub> -(PSS <sup>-</sup> Na <sup>+</sup> ) <sub>140</sub> -b-St <sub>50</sub> -b-(St <sub>0.8</sub> -co-DPPS <sub>0.2</sub> ) <sub>300</sub> -SC(S)SnPr                                                                    | /   | Figure S 1<br>Figure S 4   | Figure S 4          | Figure S 3              | Figure S 3              | /         |
| R <sub>0</sub> -(PSS <sup>-</sup> Na <sup>+</sup> ) <sub>140</sub> -b-(St <sub>0.95</sub> -co-DPPS <sub>0.05</sub> ) <sub>300</sub> -SC(S)SnPr                                                                                      | /   | Figure S 2                 |                     | Figure S 3              | Figure S 3              | -53.5±2.1 |
| R <sub>0</sub> -(PSS <sup>-</sup> Na <sup>+</sup> ) <sub>140</sub> -b-(St <sub>0.9</sub> -co-DPPS <sub>0.1</sub> ) <sub>300</sub> -SC(S)SnPr                                                                                        | /   | Figure S 2                 |                     | Figure S 3              | Figure S 3              | -50.6±3.9 |
| R <sub>0</sub> -(PSS <sup>-</sup> Na <sup>+</sup> ) <sub>140</sub> -b-(St <sub>0.8</sub> -co-DPPS <sub>0.2</sub> ) <sub>300</sub> -SC(S)SnPr                                                                                        | /   | Figure S 2<br>Figure S 4   | Figure S 4          | Figure S 3              | Figure S 3              | -49.7±7.0 |
| R <sub>0</sub> -(PSS <sup>-</sup> Na <sup>+</sup> ) <sub>140</sub> -b-(St <sub>0.75</sub> -co-DPPS <sub>0.25</sub> ) <sub>300</sub> -SC(S)SnPr                                                                                      | /   | Figure S 2                 |                     | /                       | /                       |           |
| <b>2. CCMs with a PSS<sup>-</sup>Na<sup>+</sup> shell and a mixed DEGDMA-co-St core</b>                                                                                                                                             |     |                            |                     |                         |                         |           |
| R <sub>0</sub> -(PSS <sup>-</sup> Na <sup>+</sup> ) <sub>140</sub> -b-St <sub>50</sub> -b-(St <sub>0.95</sub> -co-DPPS <sub>0.05</sub> ) <sub>300</sub> -b-(St <sub>0.9</sub> -co-DEGDMA <sub>0.1</sub> ) <sub>150</sub> -SC(S)SnPr | /   | Figure S 5<br>Figure S 9   | Figure S 9          | Figure 3<br>Figure S 6  | Figure 3                | -50.0±1.9 |
| R <sub>0</sub> -(PSS <sup>-</sup> Na <sup>+</sup> ) <sub>140</sub> -b-St <sub>50</sub> -b-(St <sub>0.9</sub> -co-DPPS <sub>0.1</sub> ) <sub>300</sub> -b-(St <sub>0.9</sub> -co-DEGDMA <sub>0.1</sub> ) <sub>150</sub> -SC(S)SnPr   | /   | Figure S 5<br>Figure S 9   | Figure S 9          | Figure 3<br>Figure S 7  | Figure 3                | -50.5±0.6 |
| R <sub>0</sub> -(PSS <sup>-</sup> Na <sup>+</sup> ) <sub>140</sub> -b-St <sub>50</sub> -b-(St <sub>0.8</sub> -co-DPPS <sub>0.2</sub> ) <sub>300</sub> -b-(St <sub>0.9</sub> -co-DEGDMA <sub>0.1</sub> ) <sub>150</sub> -SC(S)SnPr   | /   | Figure S 5<br>Figure S 9   | Figure S 9          | Figure 3<br>Figure S 8  | Figure 3                | -51.8±1.6 |
| <b>3. CCMs with a PSS<sup>-</sup>Na<sup>+</sup> shell and a neat DEGDMA core</b>                                                                                                                                                    |     |                            |                     |                         |                         |           |
| R <sub>0</sub> -(PSS <sup>-</sup> Na <sup>+</sup> ) <sub>140</sub> -b-(St <sub>0.95</sub> -co-DPPS <sub>0.05</sub> ) <sub>300</sub> -b-DEGDMA <sub>15</sub> -SC(S)SnPr                                                              | /   | Figure S 10<br>Figure S 11 | Figure S 11         | Figure 4<br>Figure S 12 | Figure 4                | -51.6±1.2 |
| R <sub>0</sub> -(PSS <sup>-</sup> Na <sup>+</sup> ) <sub>140</sub> -b-(St <sub>0.9</sub> -co-DPPS <sub>0.1</sub> ) <sub>300</sub> -b-DEGDMA <sub>15</sub> -SC(S)SnPr                                                                | /   | Figure S 10<br>Figure S 11 | Figure S 11         | Figure 4<br>Figure S 13 | Figure 4                | -54.0±2.3 |
| R <sub>0</sub> -(PSS <sup>-</sup> Na <sup>+</sup> ) <sub>140</sub> -b-(St <sub>0.8</sub> -co-DPPS <sub>0.2</sub> ) <sub>300</sub> -b-DEGDMA <sub>15</sub> -SC(S)SnPr                                                                | /   | Figure S 10<br>Figure S 11 | Figure S 11         | Figure 4<br>Figure S 14 | Figure 4                | -69.8±2.3 |
| R <sub>0</sub> -(PSS <sup>-</sup> Na <sup>+</sup> ) <sub>140</sub> -b-(St <sub>0.75</sub> -co-DPPS <sub>0.25</sub> ) <sub>300</sub> -b-DEGDMA <sub>15</sub> -SC(S)SnPr                                                              | /   | Figure S 10<br>Figure S 11 | Figure S 11         | Figure 5<br>Figure S 15 | Figure 5                | -49.7±6.8 |
| <b>4. NGs with PSS<sup>-</sup>Na<sup>+</sup> shell</b>                                                                                                                                                                              |     |                            |                     |                         |                         |           |
| R <sub>0</sub> -(PSS <sup>-</sup> Na <sup>+</sup> ) <sub>140</sub> -b-(St <sub>285</sub> -co-DPPS <sub>15</sub> -co-DEGDMA <sub>15</sub> )-SC(S)SnPr                                                                                | /   | Figure S 16                | Figure S 16         | Figure 5                | Figure 5<br>Figure S 17 | -51.2±1.2 |
| R <sub>0</sub> -(PSS <sup>-</sup> Na <sup>+</sup> ) <sub>140</sub> -b-St <sub>50</sub> -b-(St <sub>425</sub> -co-DPPS <sub>30</sub> -co-DEGDMA <sub>15</sub> )-SC(S)SnPr                                                            | /   | Figure S 16                | Figure S 16         | Figure 5                | Figure 5<br>Figure S 18 | -52.6±2.2 |



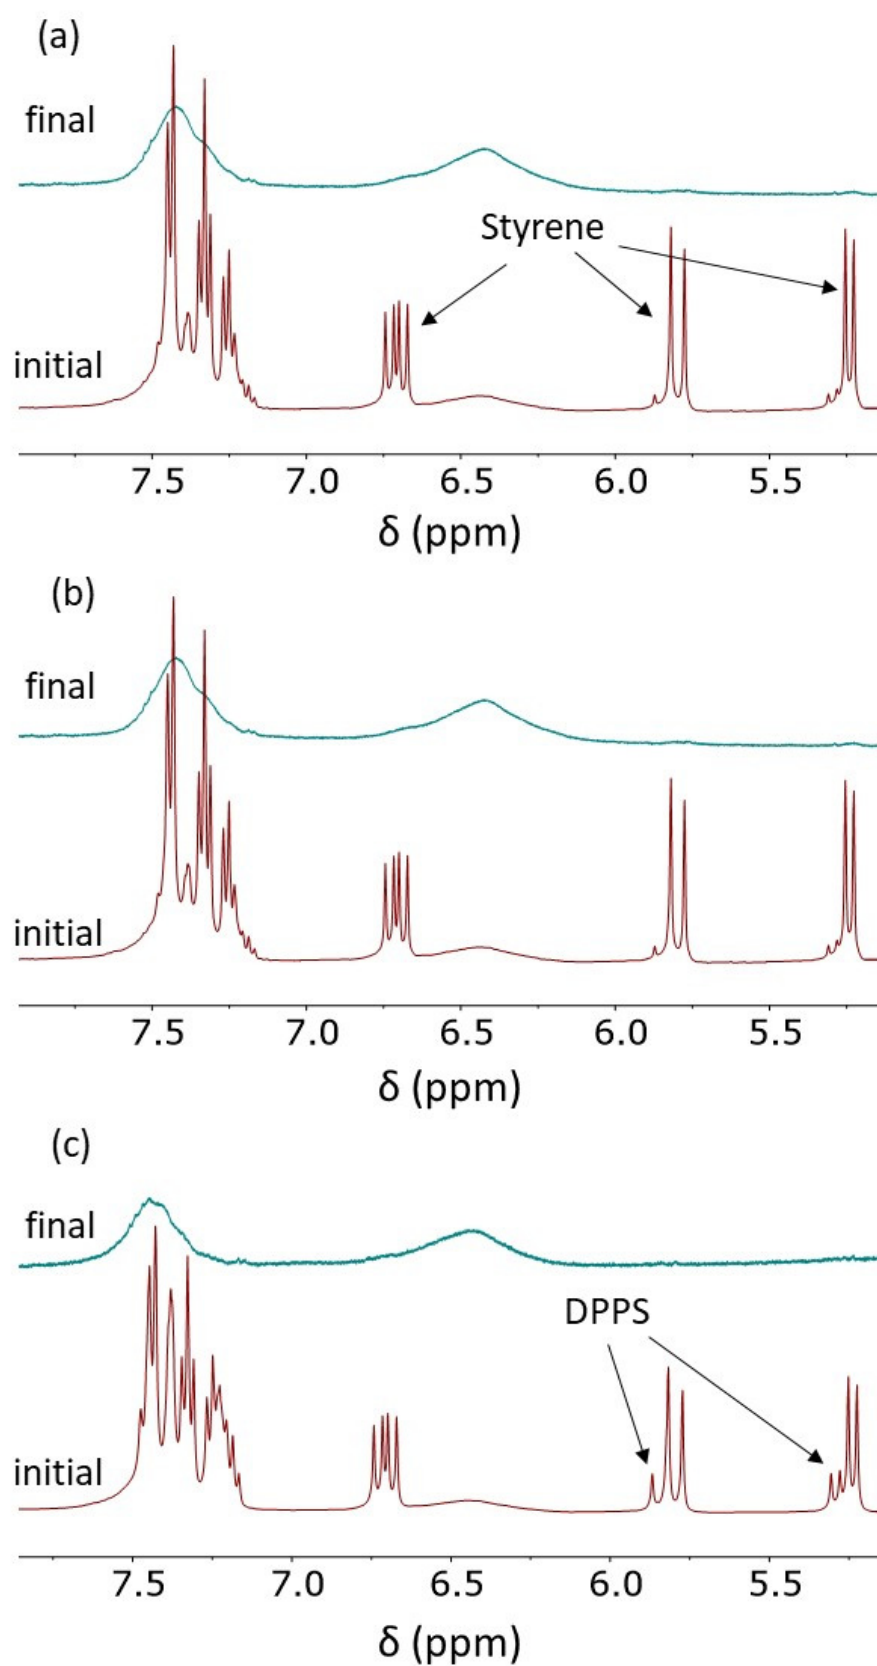

**Figure S 1.**  $^1\text{H}$  NMR monitoring of the St/DPPS copolymerization for the chain extension of  $\text{R}_0\text{-(SS}^-\text{Na}^+)_{140}\text{-}b\text{-St}_{50}\text{-SC(S)SnPr}$  to yield  $\text{R}_0\text{-(SS}^-\text{Na}^+)_{140}\text{-}b\text{-St}_{50}\text{-}b\text{-(St}_{1-y}\text{-co-DPPS}_y\text{)}_{300}\text{-SC(S)SnPr}$ . (a)  $y = 0.05$ ; (b)  $y = 0.10$ ; (c)  $y = 0.20$ . All NMR samples were prepared by adding a drop of the reaction mixture directly to the  $\text{DMSO-}d_6$  solvent in the NMR tube.

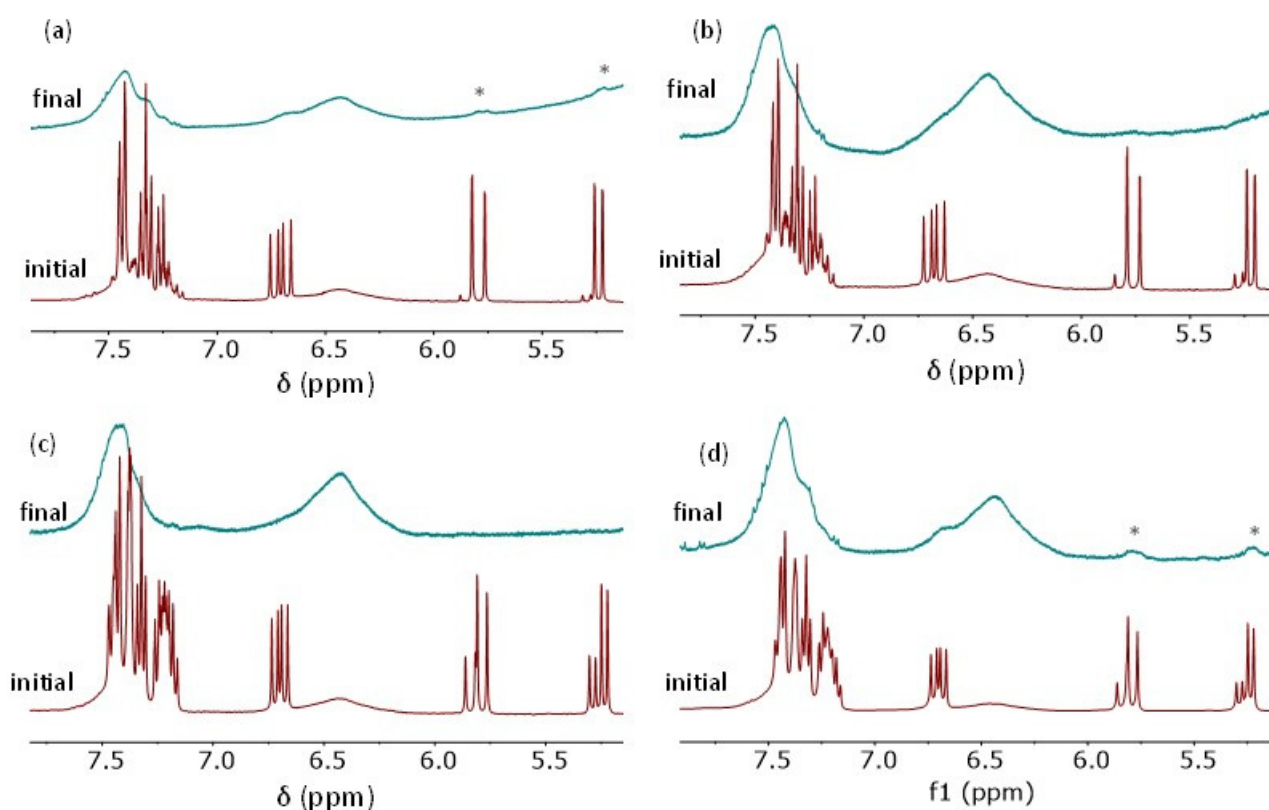

**Figure S 2.**  $^1\text{H}$  NMR monitoring of the St/DPPS copolymerization for the chain extension of  $\text{R}_0\text{-(SS}^-\text{Na}^+)_{140}\text{-SC(S)SnPr}$  to yield  $\text{R}_0\text{-(SS}^-\text{Na}^+)_{140}\text{-}b\text{-(St}_{1-y}\text{-co-DPPS}_y\text{)}_{300}\text{-SC(S)SnPr}$ . (a)  $y = 0.05$ ; (b)  $y = 0.10$ ; (c)  $y = 0.20$ ; (d)  $y = 0.25$ . The starred resonances correspond to residual styrene ( $< 1\%$  by integration against the trioxane standard). All NMR samples were prepared by adding a drop of the reaction mixture directly to the  $\text{DMSO-}d_6$  solvent in the NMR tube.

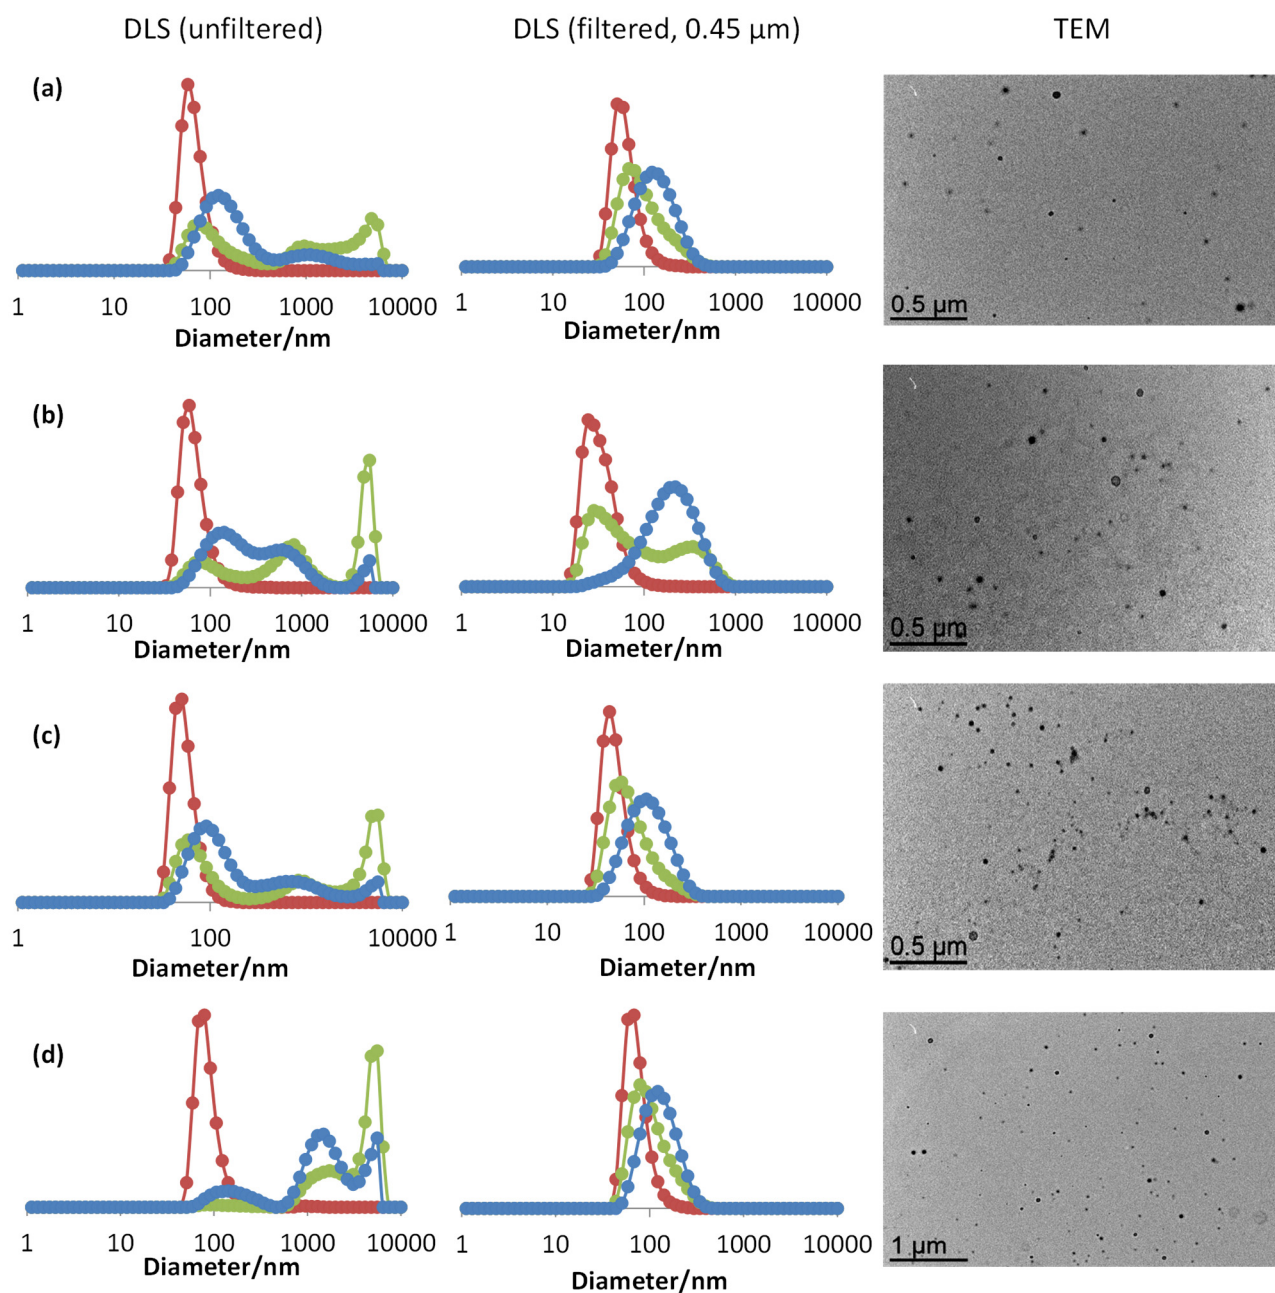

**Figure S 3.** DLS and TEM characterization of the amphiphilic di(tri)-block copolymers,  $R_0\text{-(SS}^-\text{Na}^+)_{140}\text{-}b\text{-St}_x\text{-}b\text{-(St}_{1-y}\text{-}co\text{-DPPS}_y)_{300}\text{-SC(S)SnPr}$ . (a)  $x = 50$ ,  $y = 0.20$ ; (b)  $x = 0$ ,  $y = 0.05$ ; (c)  $x = 0$ ,  $y = 0.10$ ; (d)  $x = 0$ ,  $y = 0.20$ . Color coding for the DLS size distributions: number (red), volume (green) and intensity (blue).

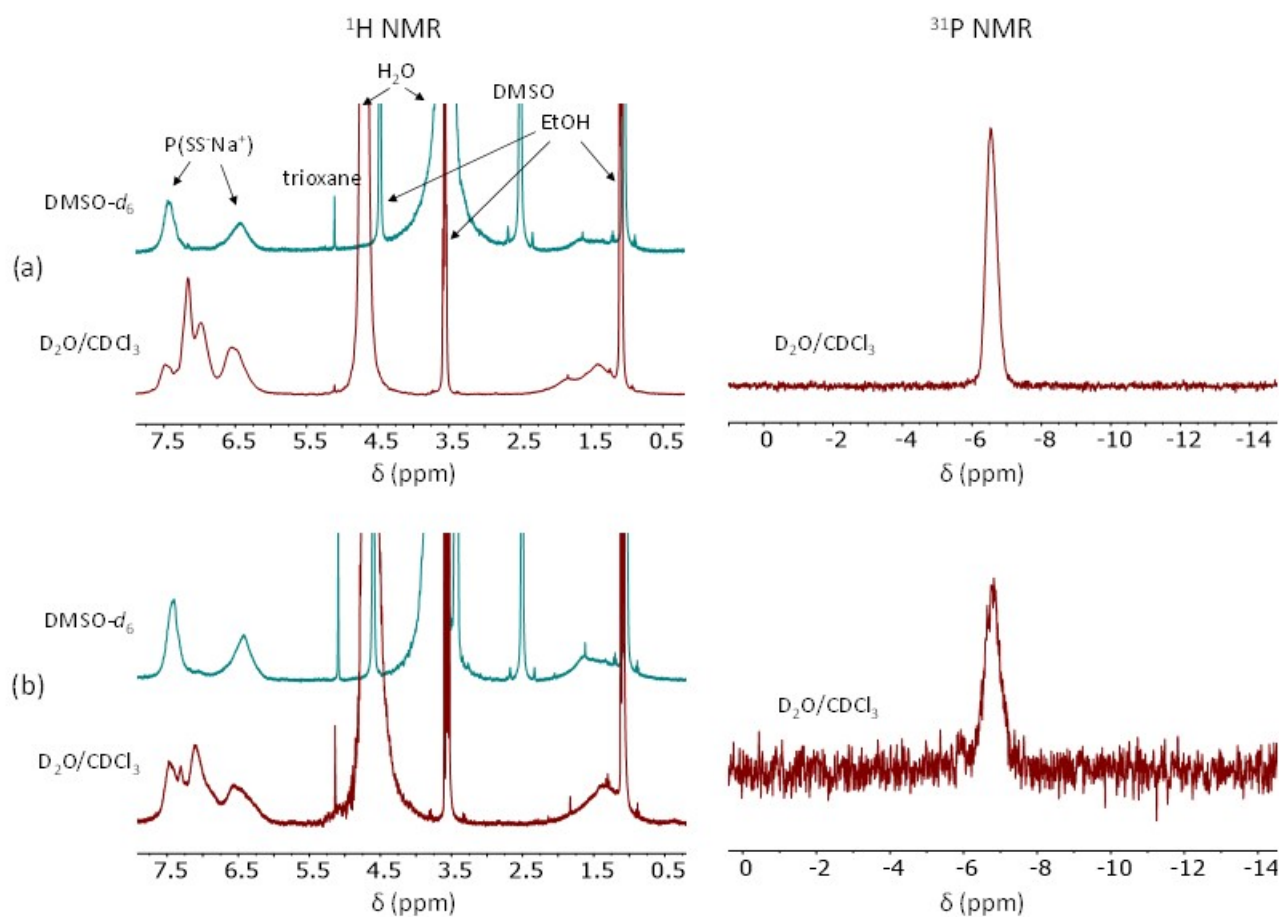

**Figure S 4.**  $^1\text{H}$  and  $^{31}\text{P}$  NMR spectra of (a)  $\text{R}_0\text{-(SS}^-\text{Na}^+)_{140}\text{-b-(St}_{0.8}\text{-co-DPPS}_{0.2})_{300}\text{-SC(S)SnPr}$  and (b)  $\text{R}_0\text{-(SS}^-\text{Na}^+)_{140}\text{-b-St}_{50}\text{-b-(St}_{0.8}\text{-co-DPPS}_{0.2})_{300}\text{-SC(S)SnPr}$  latexes in  $\text{D}_2\text{O}/\text{CDCl}_3$  (3:1 v/v). The  $^1\text{H}$  NMR spectra in DMSO- $d_6$  are also shown for comparison.

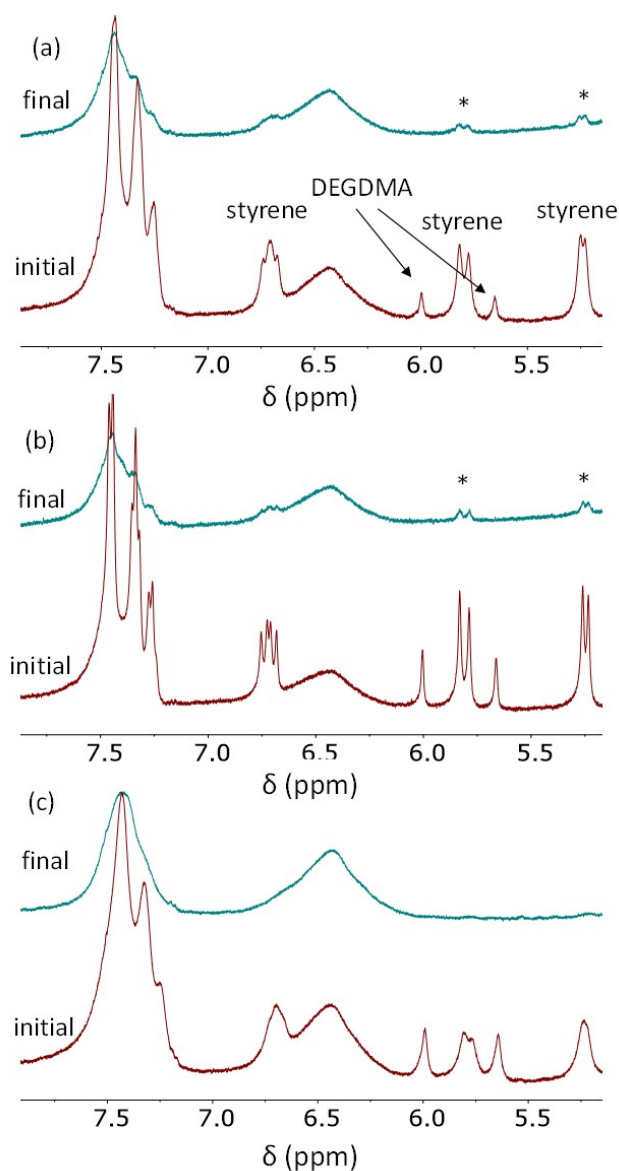

**Figure S 5.**  $^1\text{H}$  NMR monitoring of the St/DEGDMA copolymerization for the crosslinking of  $\text{R}_0\text{-(SS}^+\text{Na}^+)_{140}\text{-}b\text{-St}_{50}\text{-}b\text{-(St}_{1-y}\text{-co-DPPS}_y\text{)}_{300}\text{-SC(S)SnPr}$  to yield the CCMs  $\text{R}_0\text{-(SS}^+\text{Na}^+)_{140}\text{-}b\text{-St}_{50}\text{-}b\text{-(St}_{1-y}\text{-co-DPPS}_y\text{)}_{300}\text{-}b\text{-(St}_{0.9}\text{-co-DEGDMA}_{0.1}\text{)}_{150}\text{-SC(S)SnPr}$ . (a)  $y = 0.05$ ; (b)  $y = 0.10$ ; (c)  $y = 0.20$ . The starred resonances correspond to residual styrene ( $< 1\%$  by integration against the trioxane standard). All NMR samples were prepared by adding a drop of the reaction mixture directly to the  $\text{DMSO-}d_6$  solvent in the NMR tube.

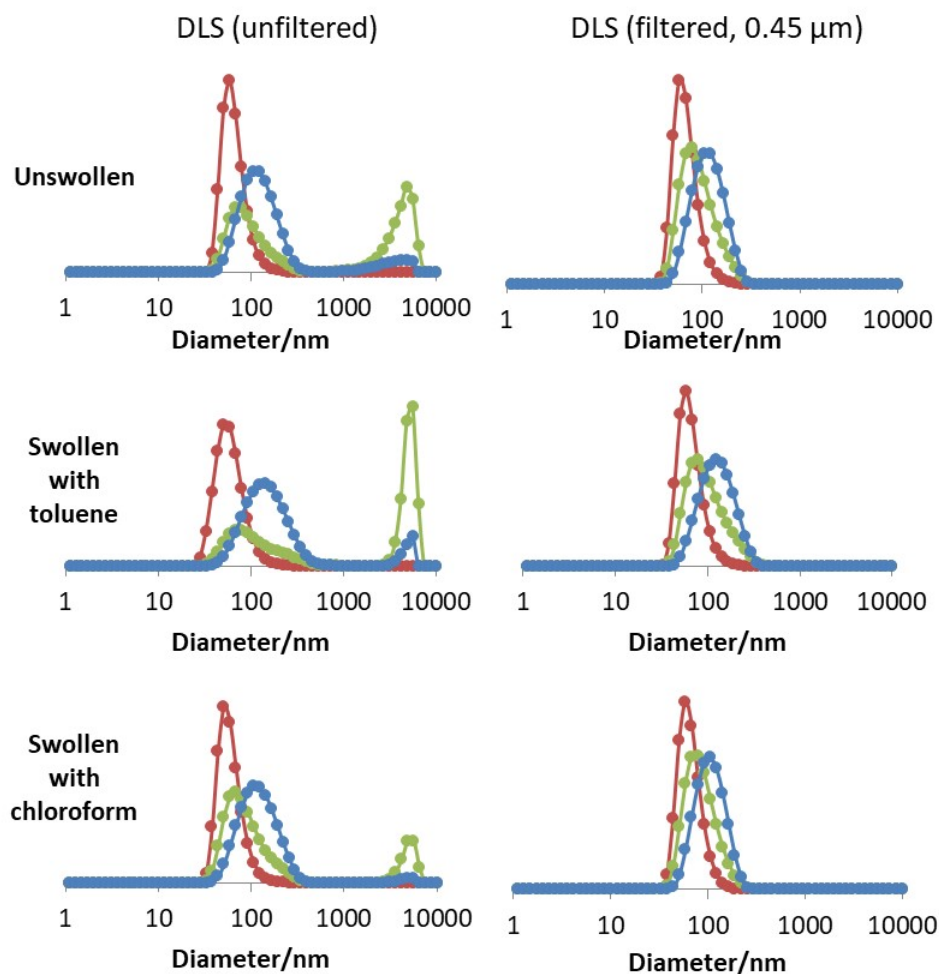

**Figure S 6.** Comparison of unfiltered and filtered DLS traces of the aqueous dispersions of the CCMs  $R_0\text{-(SS}^-\text{Na}^+)_{140}\text{-}b\text{-St}_{50}\text{-}b\text{-(St}_{0.95}\text{-co-DPPS}_{0.05})_{300}\text{-}b\text{-(St}_{0.90}\text{-co-DEGDMA}_{0.10})_{150}\text{-SC(S)SnPr}$ . Color coding for the DLS size distributions: number (red), volume (green) and intensity (blue).



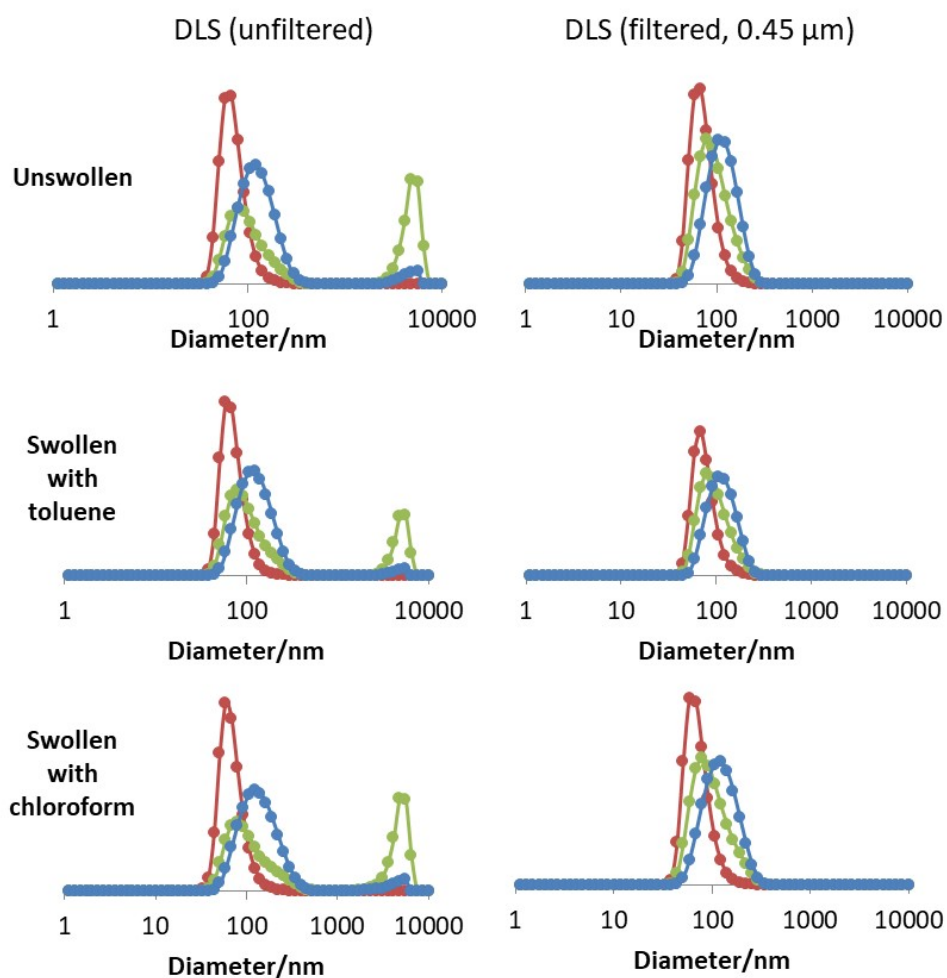

**Figure S 7.** Comparison of unfiltered and filtered DLS traces of the aqueous dispersions of the CCMs  $R_0\text{-(SS}^-\text{Na}^+)_{140}\text{-}b\text{-(St}_{50}\text{-}b\text{-(St}_{0.90}\text{-}co\text{-DPPS}_{0.10})_{300}\text{-}b\text{-(St}_{0.90}\text{-}co\text{-DEGDMA}_{0.10})_{150}\text{-SC(S)SnPr}$ . Color coding for the DLS size distributions: number (red), volume (green) and intensity (blue).

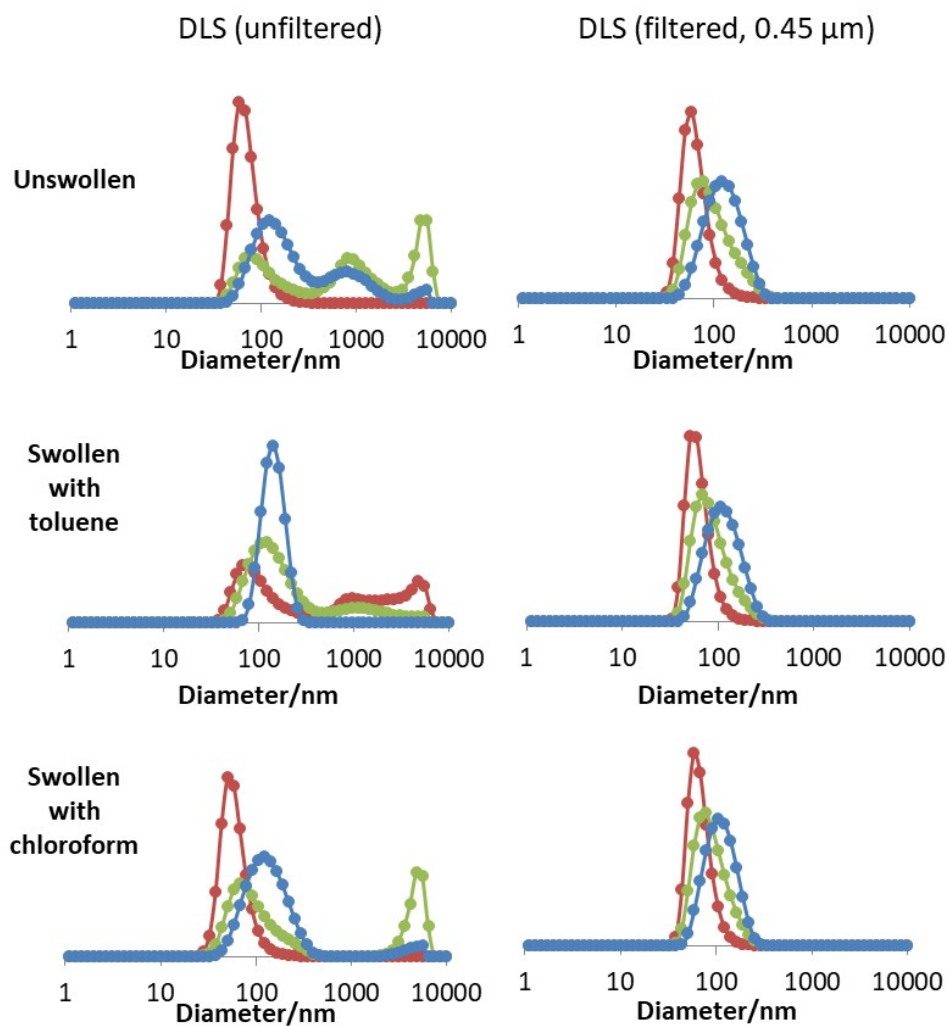

**Figure S 8.** Comparison of unfiltered and filtered DLS traces of the aqueous dispersions of the CCMs  $R_0\text{-(SS}^-\text{Na}^+)_{140}\text{-}b\text{-(St}_{50}\text{-}b\text{-(St}_{0.80}\text{-}co\text{-DPPS}_{0.20})_{300}\text{-}b\text{-(St}_{0.90}\text{-}co\text{-DEGDMA}_{0.10})_{150}\text{-SC(S)SnPr}$ . Color coding for the DLS size distributions: number (red), volume (green) and intensity (blue).

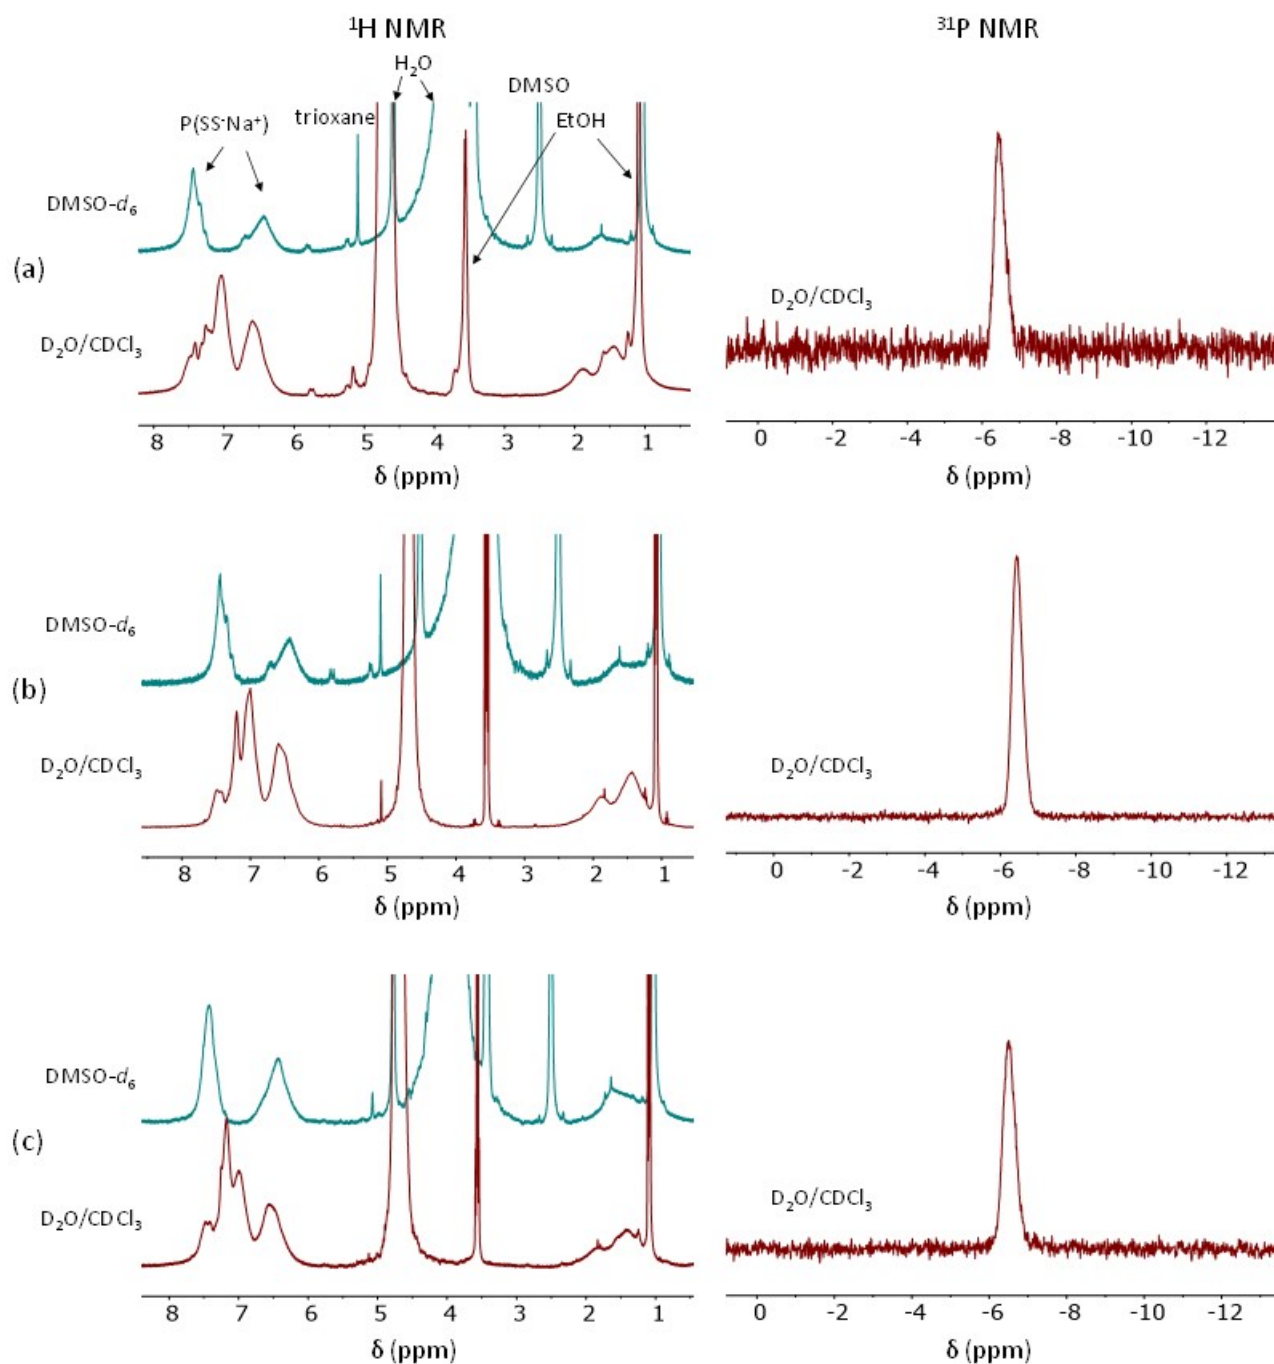

**Figure S 9.**  $^1\text{H}$  and  $^{31}\text{P}$  NMR spectra of  $\text{R}_0\text{-(SS-Na}^+\text{)}_{140}\text{-}b\text{-St}_{50}\text{-}b\text{-(St}_{1-y}\text{-co-DPPS}_y\text{)}_{300}\text{-}b\text{-(St}_{0.9}\text{-co-DEGDMA}_{0.1}\text{)}_{150}\text{-SC(S)SnPr}$  latexes in  $\text{D}_2\text{O/CDCl}_3$  (3:1 v/v). (a)  $y = 0.05$ ; (b)  $y = 0.10$ ; (c)  $y = 0.20$ . The  $^1\text{H}$  NMR spectra in  $\text{DMSO-}d_6$  are also shown for comparison.

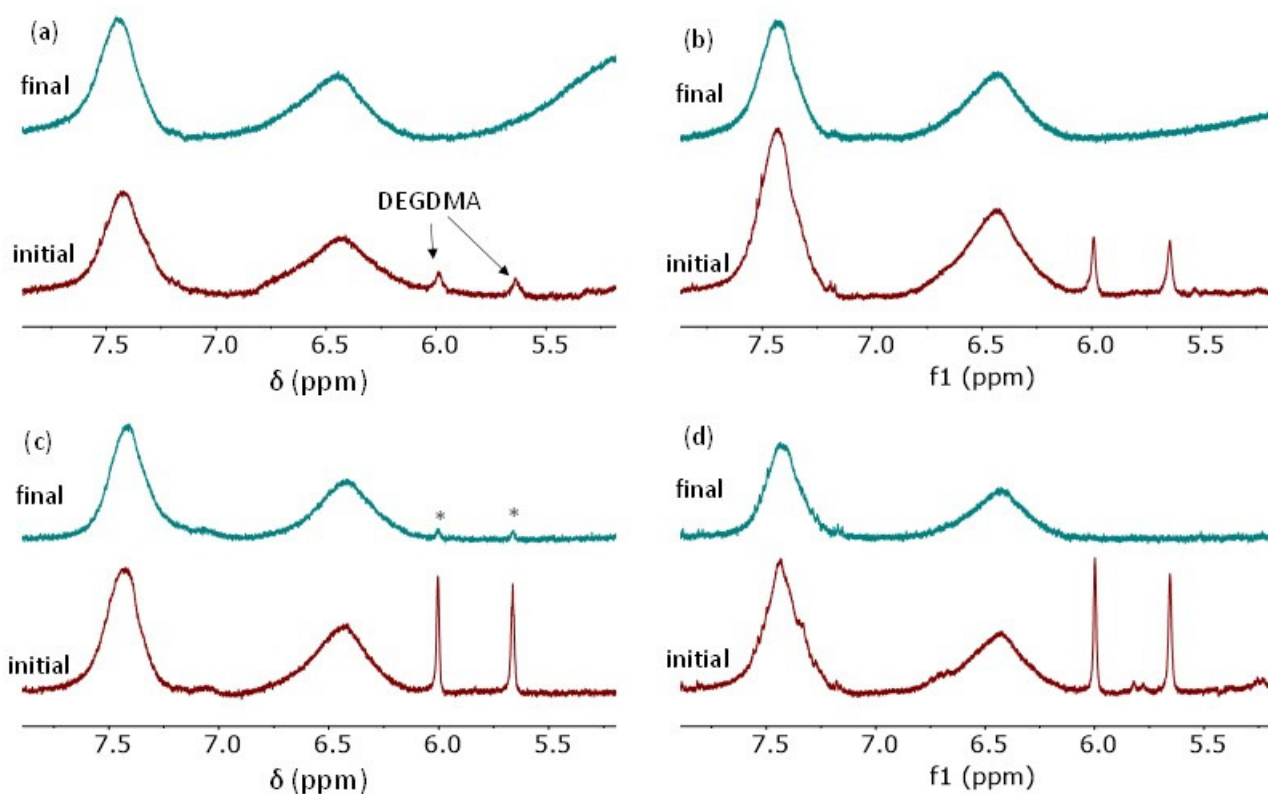

**Figure S 10.**  $^1\text{H}$  NMR monitoring of the DEGDM polymerization for the crosslinking of  $\text{R}_0\text{-(SS}^-\text{Na}^+)_{140}\text{-}b\text{-(St}_{1-y}\text{-co-DPPS}_y)_{300}\text{-SC(S)SnPr}$  to yield the CCMs  $\text{R}_0\text{-(SS}^-\text{Na}^+)_{140}\text{-}b\text{-(St}_{1-y}\text{-co-DPPS}_y)_{300}\text{-}b\text{-DEGDMA}_{15}\text{-SC(S)SnPr}$ . (a)  $y = 0.05$ ; (b)  $y = 0.10$ ; (c)  $y = 0.20$ ; (d)  $y = 0.25$ . The starred resonances correspond to residual DEGDM ( $< 1\%$  by integration against the trioxane standard). All NMR samples were prepared by adding a drop of the reaction mixture directly to the  $\text{DMSO-}d_6$  solvent in the NMR tube.

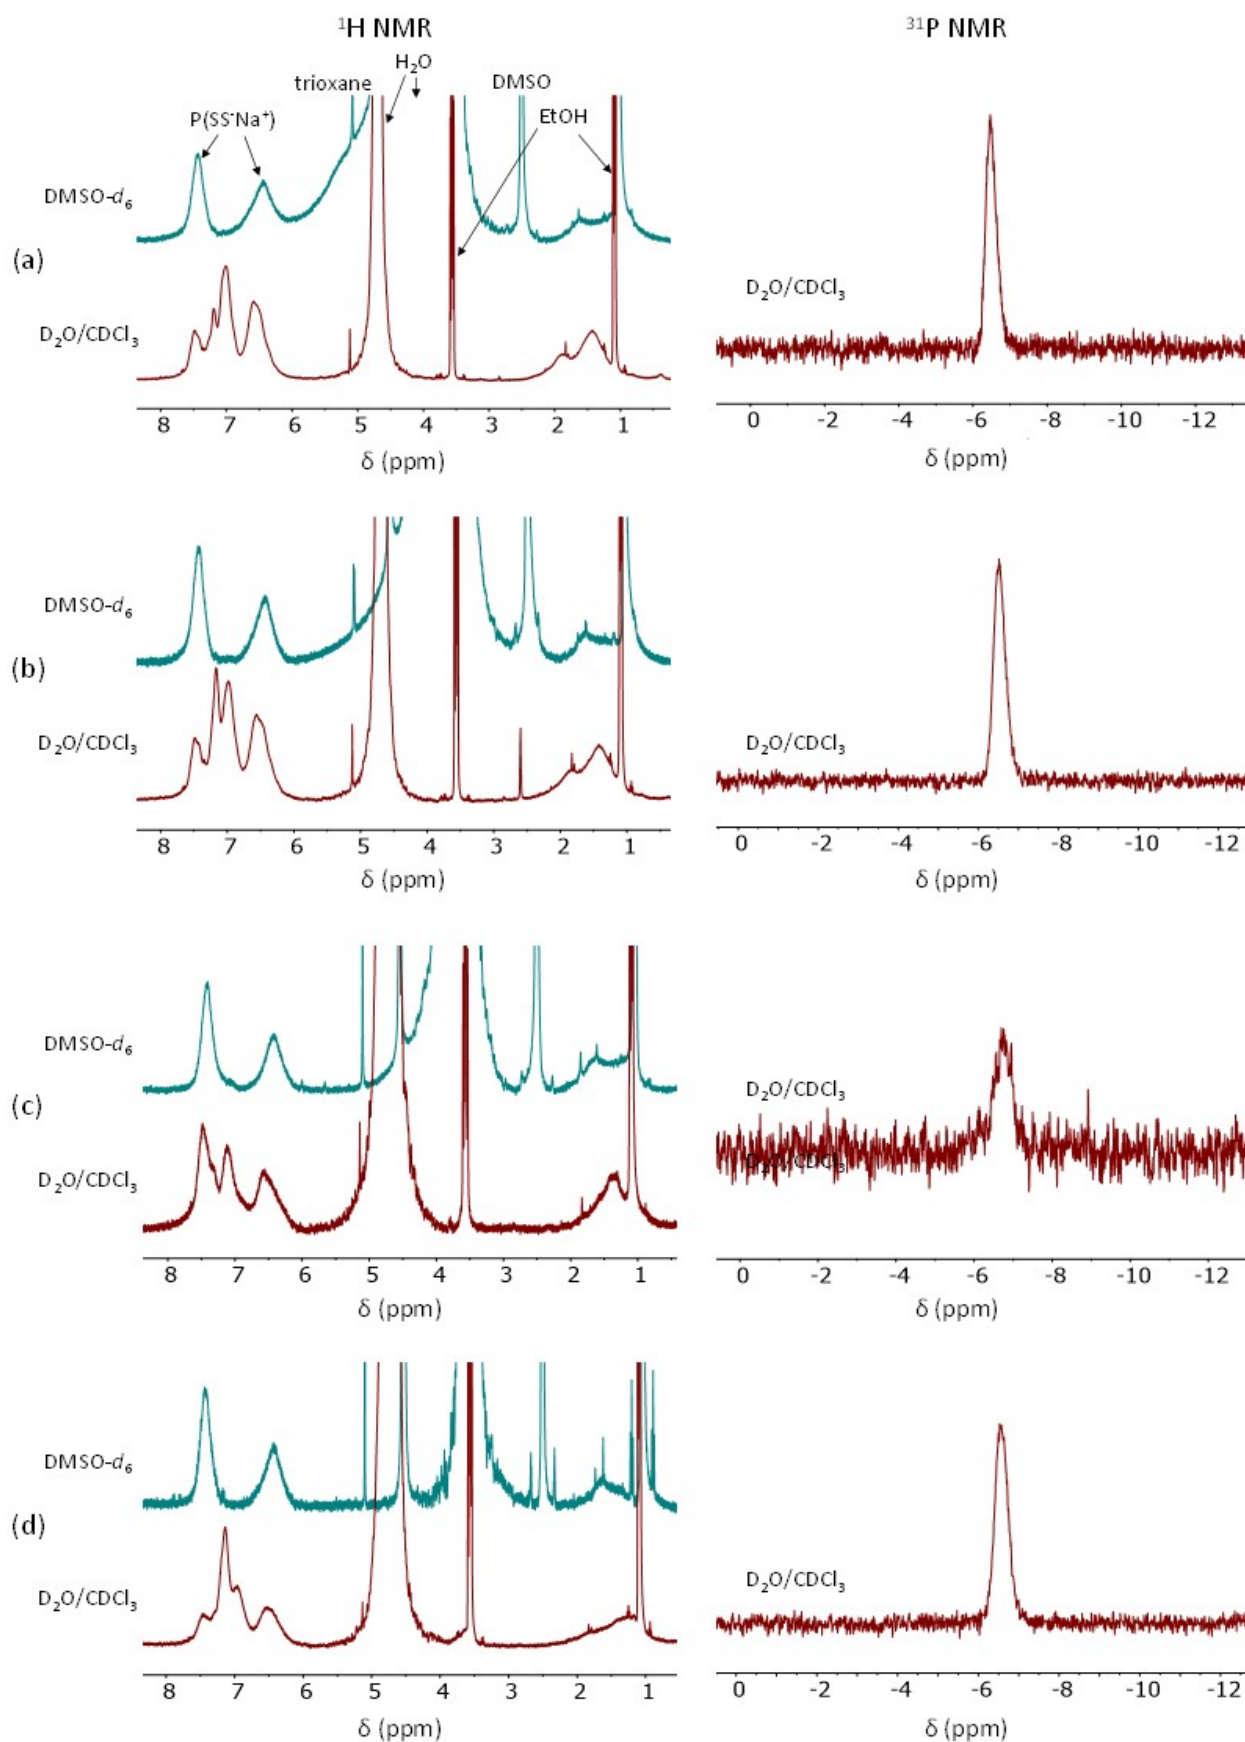

**Figure S 11.**  $^1\text{H}$  and  $^{31}\text{P}$  NMR spectra of  $\text{R}_0\text{-(SS-Na}^+\text{)}_{140}\text{-}b\text{-(St}_{1-y}\text{-co-DPPS}_y\text{)-}b\text{-DEGDMA}_{15}\text{-SC(S)SnPr}$  latexes in  $\text{D}_2\text{O/CDCl}_3$  (3:1 v/v). (a)  $y = 0.05$ ; (b)  $y = 0.1$ ; (c)  $y = 0.2$ ; (d)  $y = 0.25$ . The  $^1\text{H}$  NMR spectra in  $\text{DMSO-}d_6$  are also shown for comparison.

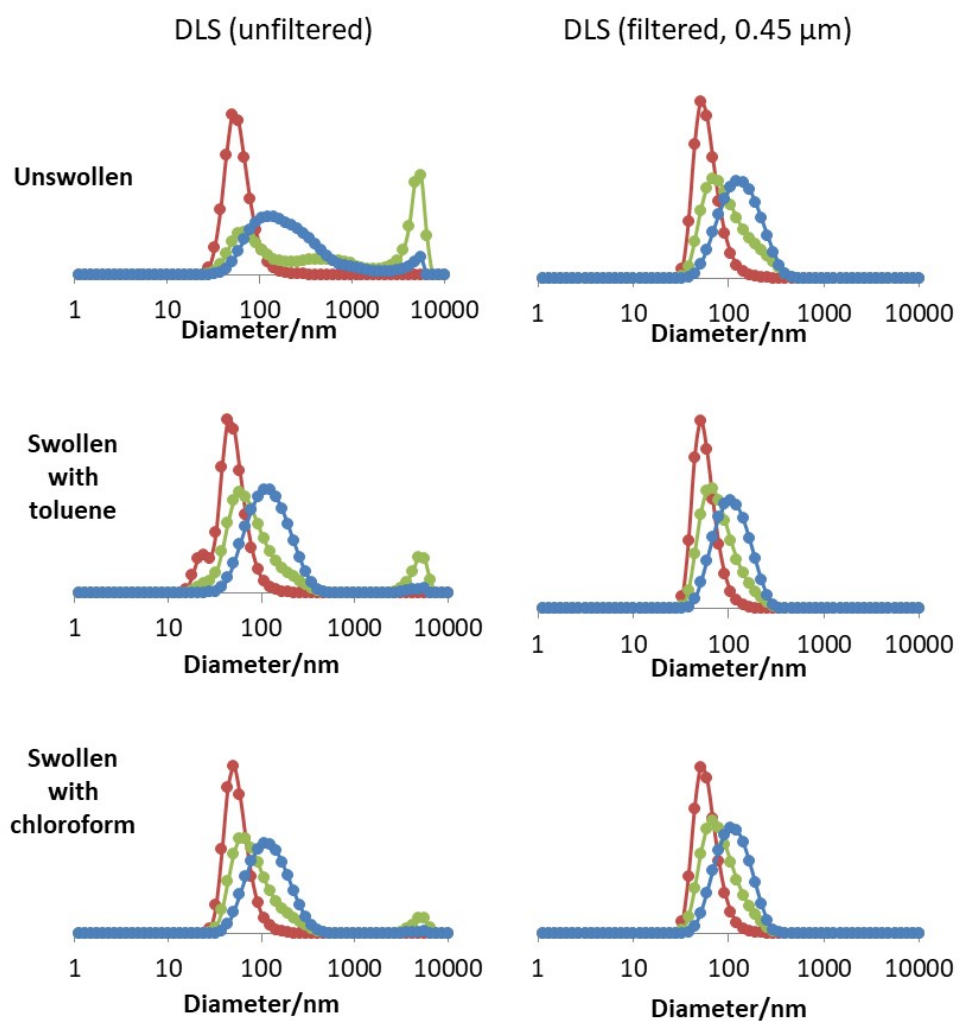

**Figure S 12.** Comparison of unfiltered and filtered DLS traces of the aqueous dispersions of the CCMs  $R_0\text{-(SS}^+\text{Na}^+)_{140}\text{-}b\text{-(St}_{0.95}\text{-co-DPPS}_{0.05})_{300}\text{-}b\text{-DEGDMA}_{15}\text{-SC(S)SnPr}$ . Color coding for the DLS size distributions: number (red), volume (green) and intensity (blue).



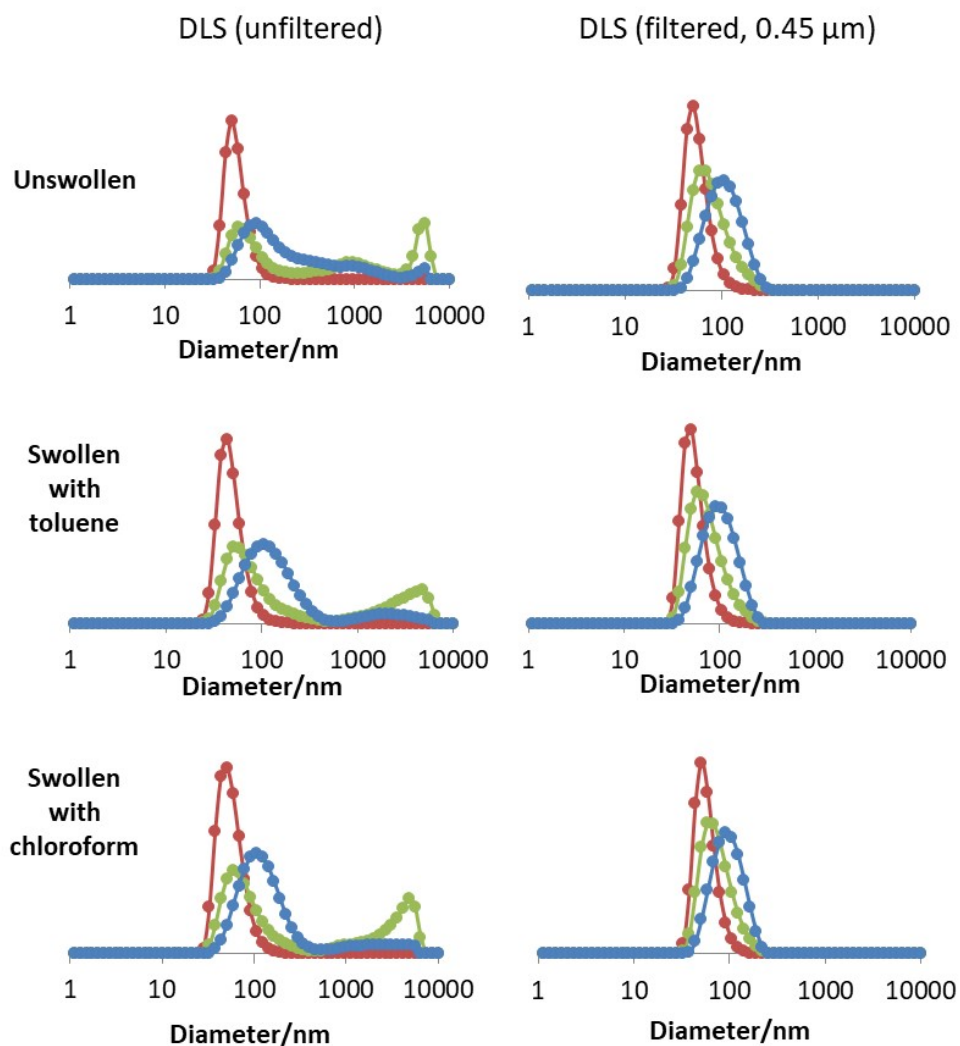

**Figure S 13.** Comparison of unfiltered and filtered DLS traces of the aqueous dispersions of the CCMs  $R_0\text{-(SS}^-\text{Na}^+)_{140}\text{-}b\text{-(St}_{0.90}\text{-co-DPPS}_{0.10})_{300}\text{-}b\text{-DEGDMA}_{15}\text{-SC(S)SnPr}$ . Color coding for the DLS size distributions: number (red), volume (green) and intensity (blue).

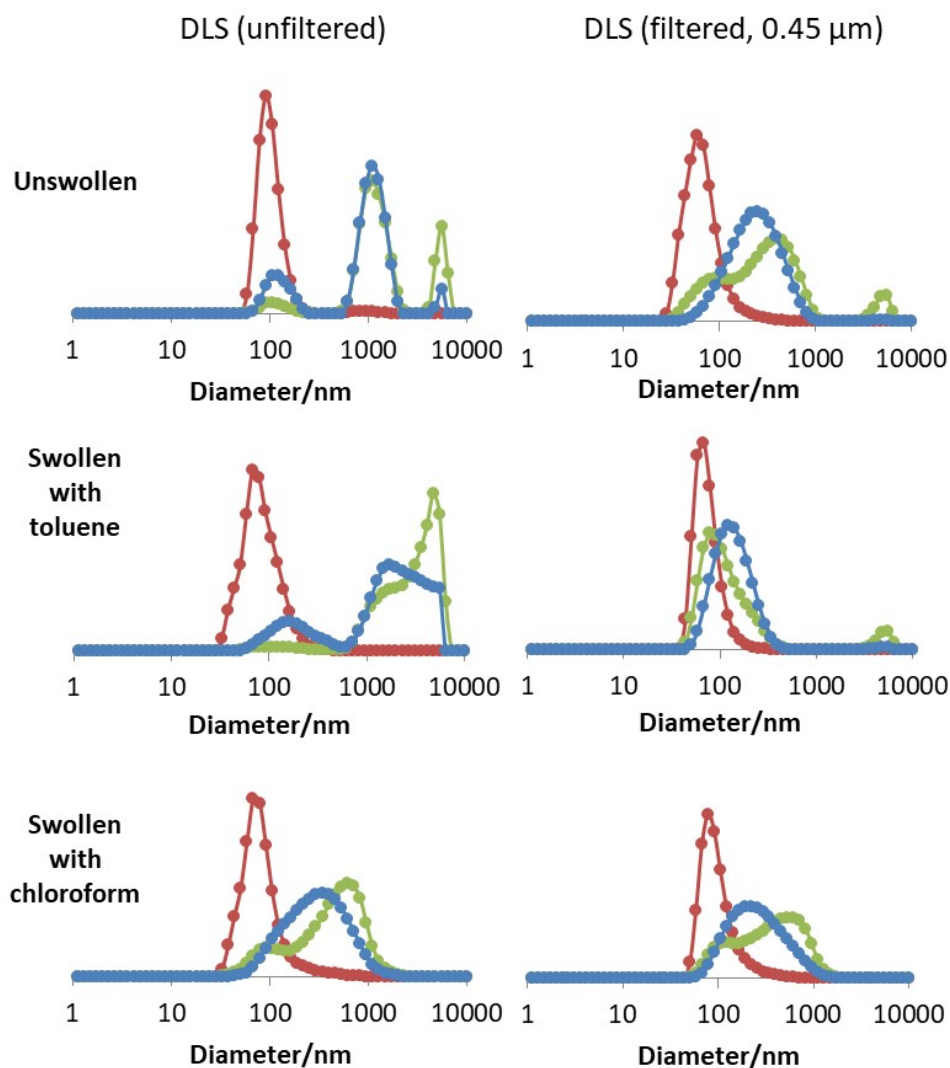

**Figure S 14.** Comparison of unfiltered and filtered DLS traces of the aqueous dispersions of the CCMs  $R_0\text{-(SS}^-\text{Na}^+)_{140}\text{-}b\text{-(St}_{0.80}\text{-co-DPPS}_{0.20})_{300}\text{-}b\text{-DEGDMA}_{15}\text{-SC(S)SnPr}$ . Color coding for the DLS size distributions: number (red), volume (green) and intensity (blue).

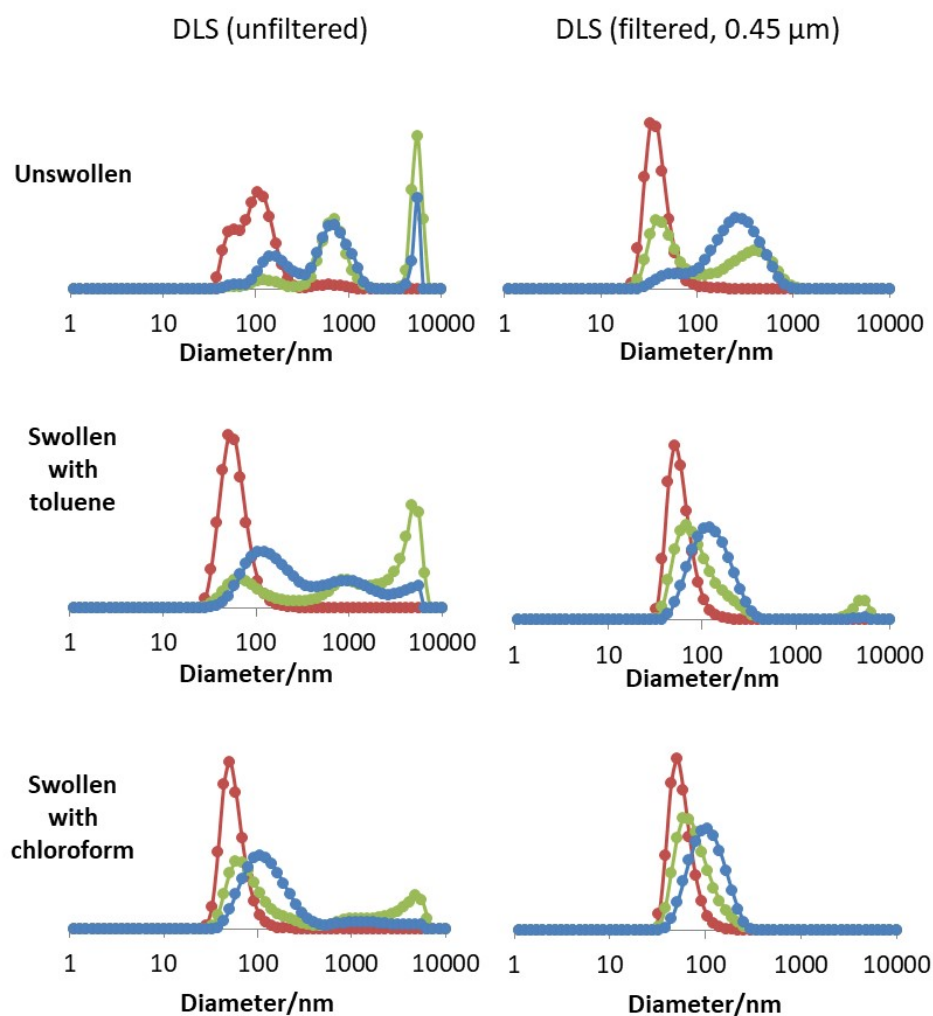

**Figure S 15.** Comparison of unfiltered and filtered DLS traces of the aqueous dispersions of the CCMs  $R_0\text{-(SS}^-\text{Na}^+)_{140}\text{-}b\text{-(St}_{0.75}\text{-co-DPPS}_{0.25})_{300}\text{-}b\text{-DEGDMA}_{15}\text{-SC(S)SnPr}$ . Color coding for the DLS size distributions: number (red), volume (green) and intensity (blue).

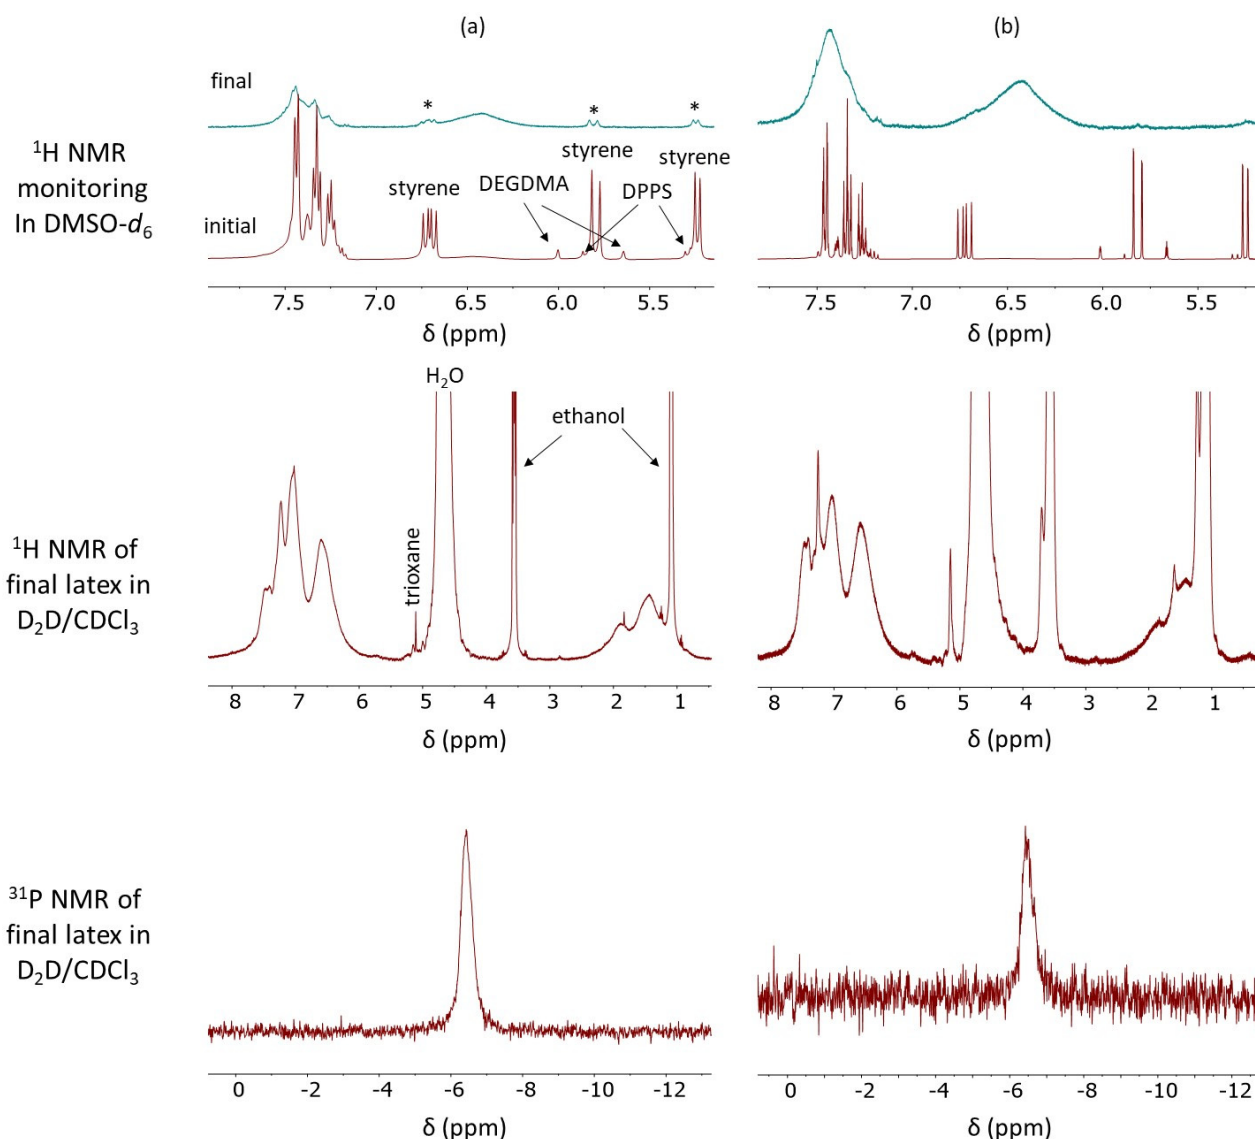

**Figure S 16.** NMR data for the synthesis of the NGs R<sub>0</sub>-(SS<sup>-</sup>Na<sup>+</sup>)<sub>140</sub>-*b*-St<sub>*x*</sub>-*b*-(St<sub>*y*</sub>-*co*-DPPS<sub>*z*</sub>-*co*-DEGDMA<sub>15</sub>)-SC(S)SnPr. (a) *x* = 0, *y* = 285, *z* = 15; (b) *x* = 50, *y* = 425, *z* = 30. The starred resonances correspond to residual styrene [2.2% for (a), < 1% for (b), by integration against the trioxane standard]. All NMR samples were prepared by adding a drop of the reaction mixture directly to the deuterated solvent or solvent mixture in the NMR tube.

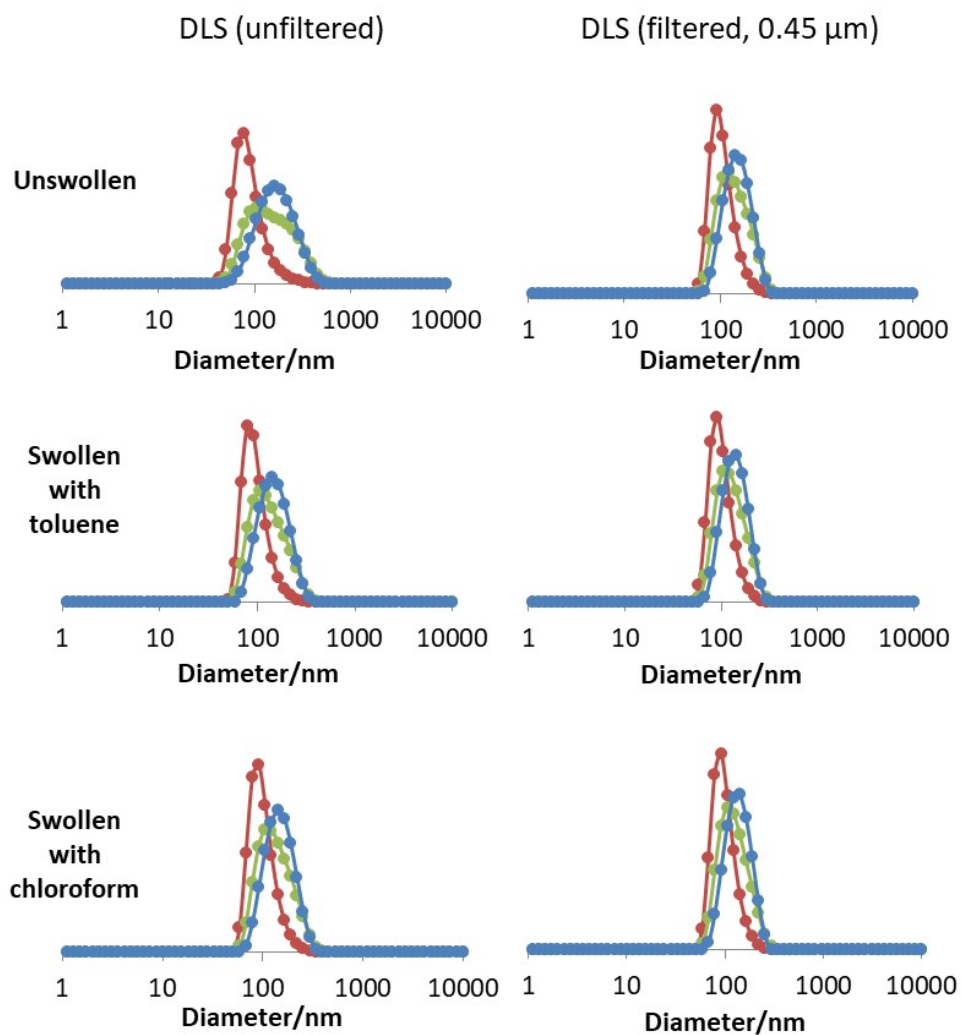

**Figure S 17.** Comparison of unfiltered and filtered DLS traces of the aqueous dispersions of the NG  $\text{R}_0\text{-(SS-Na}^+\text{)}_{140}\text{-}b\text{-(St}_{285}\text{-co-DPPS}_{15}\text{-co-DEGDMA}_{15}\text{)-SC(S)SnPr}$ . Color coding for the DLS size distributions: number (red), volume (green) and intensity (blue).

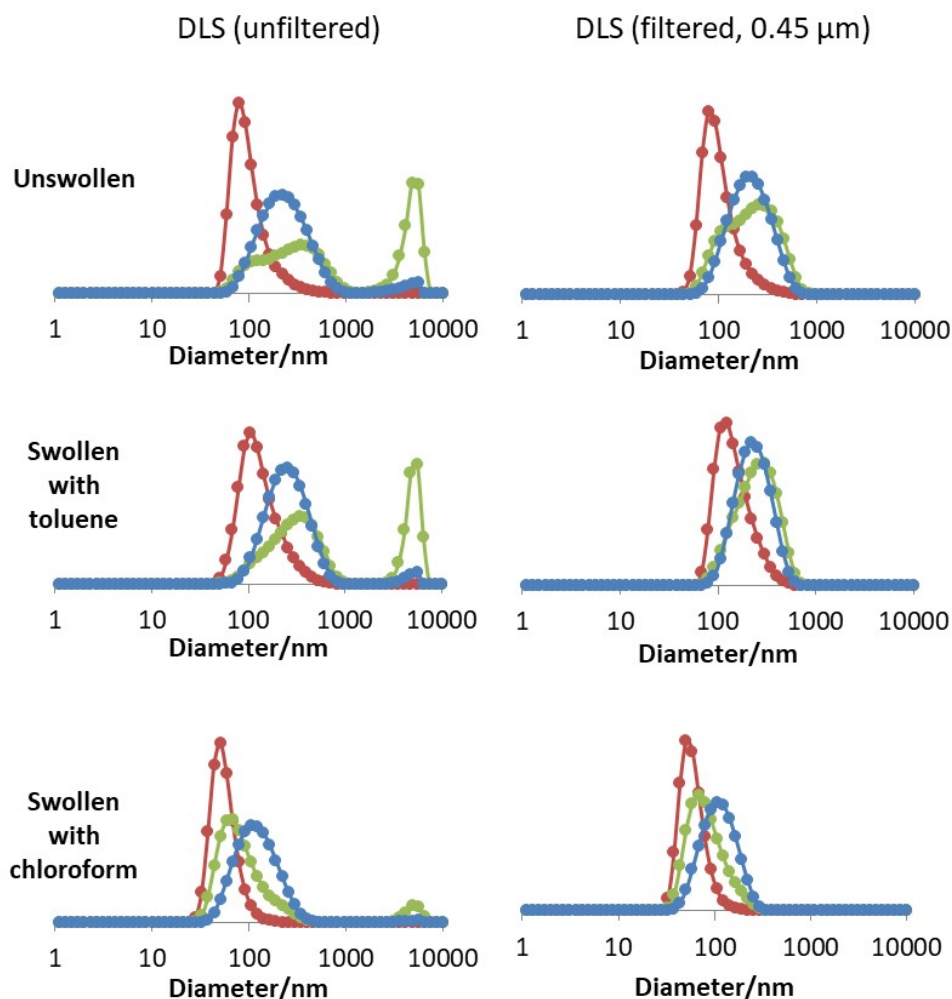

**Figure S 18.** Comparison of unfiltered and filtered DLS traces of the aqueous dispersions of the NG  $R_0\text{-(SS}^-\text{Na}^+)_{140}\text{-}b\text{-(St}_{50}\text{-}b\text{-(St}_{425}\text{-}co\text{-DPPS}_{30}\text{-}co\text{-DEGDMA}_{15})\text{-SC(S)SnPr}$ . Color coding for the DLS size distributions: number (red), volume (green) and intensity (blue).

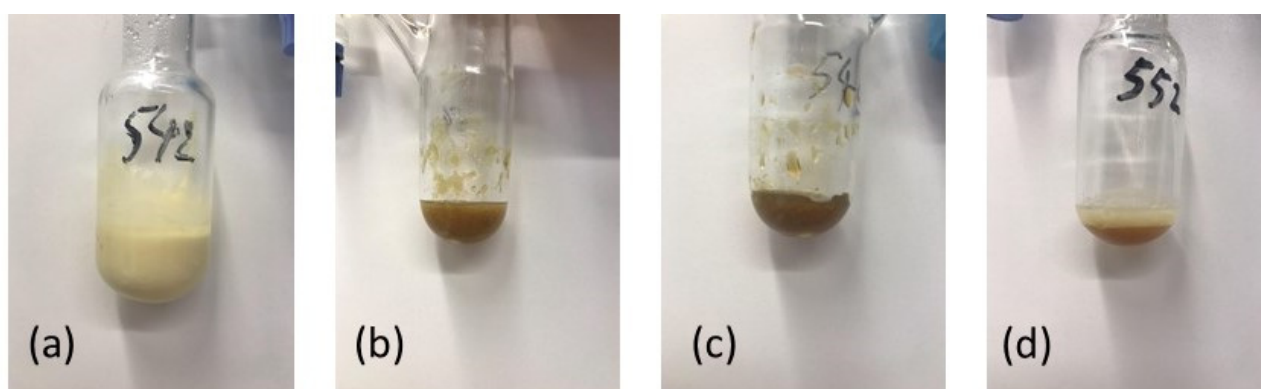

**Figure S 19.** Photos of the CCM and NG polymer latexes after treatment with a toluene solution of  $[\text{RhCl(COD)}]_2$  ( $\text{P/Rh} = 1:1$ ). (a)  $R_0\text{-(SS}^-\text{Na}^+)_{140}\text{-}b\text{-(St}_{0.75}\text{-}co\text{-DPPS}_{0.25})_{300}\text{-}b\text{-DEGDMA}_{15}\text{-SC(S)SnPr}$ ; (b)  $R_0\text{-(SS}^-\text{Na}^+)_{140}\text{-}b\text{-(St}_{0.9}\text{-}co\text{-DPPS}_{0.1})_{300}\text{-}b\text{-DEGDMA}_{15}\text{-SC(S)SnPr}$ ; (c)  $R_0\text{-(SS}^-\text{Na}^+)_{140}\text{-}b\text{-(St}_{50}\text{-}b\text{-(St}_{0.9}\text{-}co\text{-DPPS}_{0.1})_{300}\text{-}b\text{-(St}_{0.9}\text{-}co\text{-DEGDMA}_{0.1})_{150}\text{-SC(S)SnPr}$ ; (d)  $R_0\text{-(SS}^-\text{Na}^+)_{140}\text{-}b\text{-(St}_{285}\text{-}co\text{-DPPS}_{15}\text{-}co\text{-DEGDMA}_{15})\text{-SC(S)SnPr}$ .



**(b)  $^1\text{H}$  NMR investigations of the Rh-sulfonate interaction**

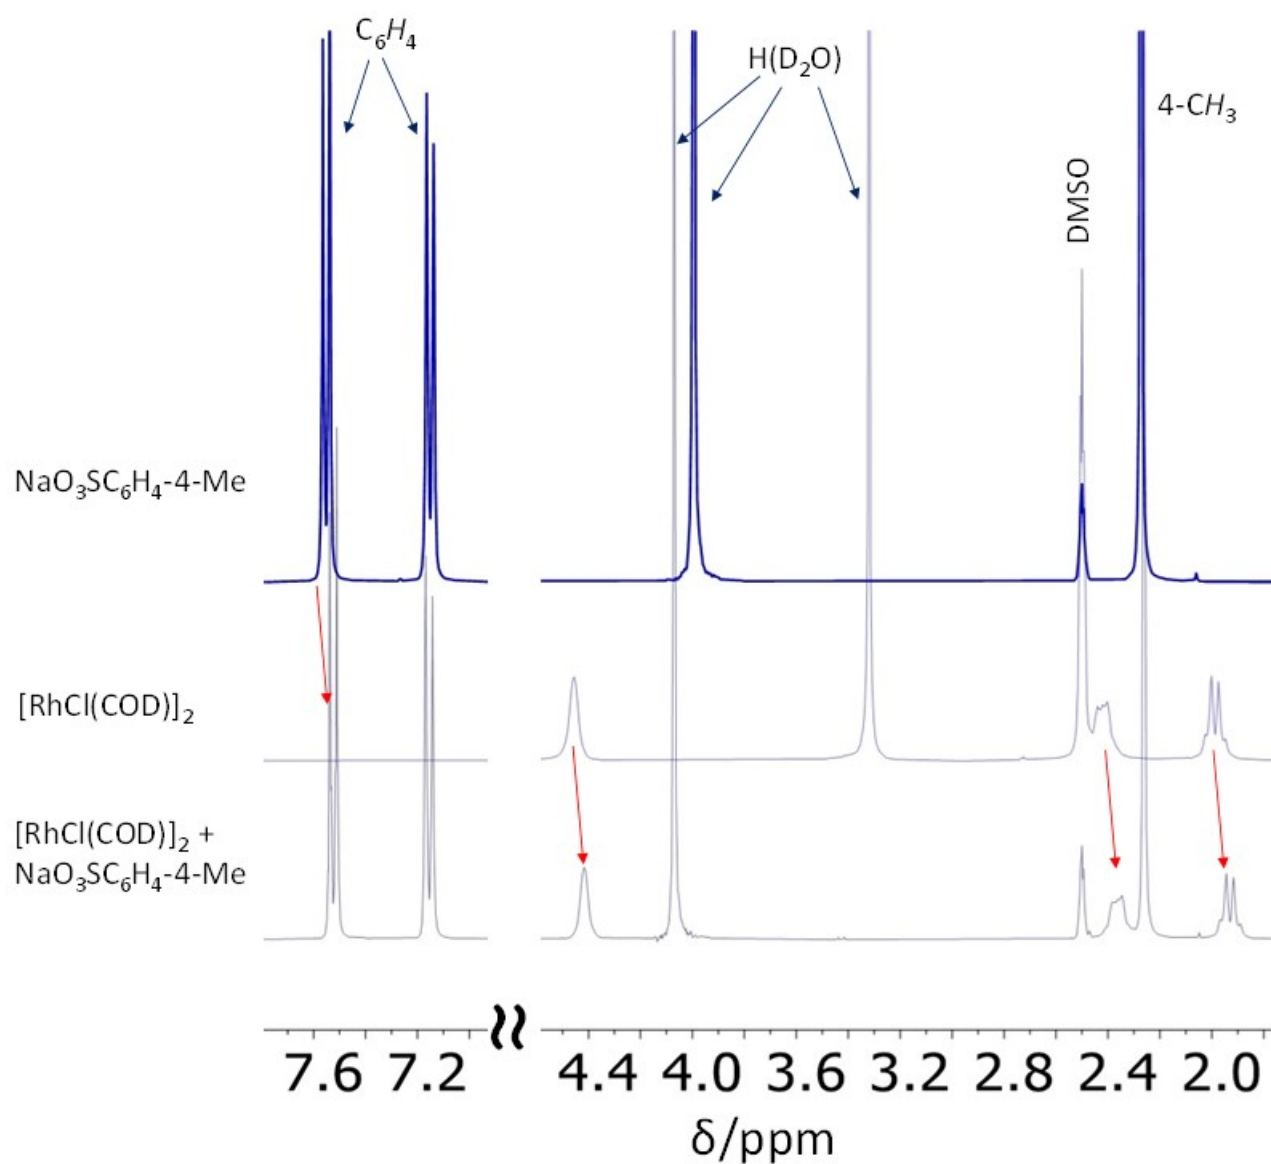

**Figure S 20.**  $^1\text{H}$  NMR spectrum in  $\text{DMSO-}d_6/\text{D}_2\text{O}$  (4:1 v/v) of the  $[\text{RhCl}(\text{COD})]_2/\text{NaO}_3\text{SC}_6\text{H}_4\text{-4-CH}_3$  mixture (Rh/sulfonate = ca. 1:5), in comparison with those of the separate reagents measured under the same conditions.

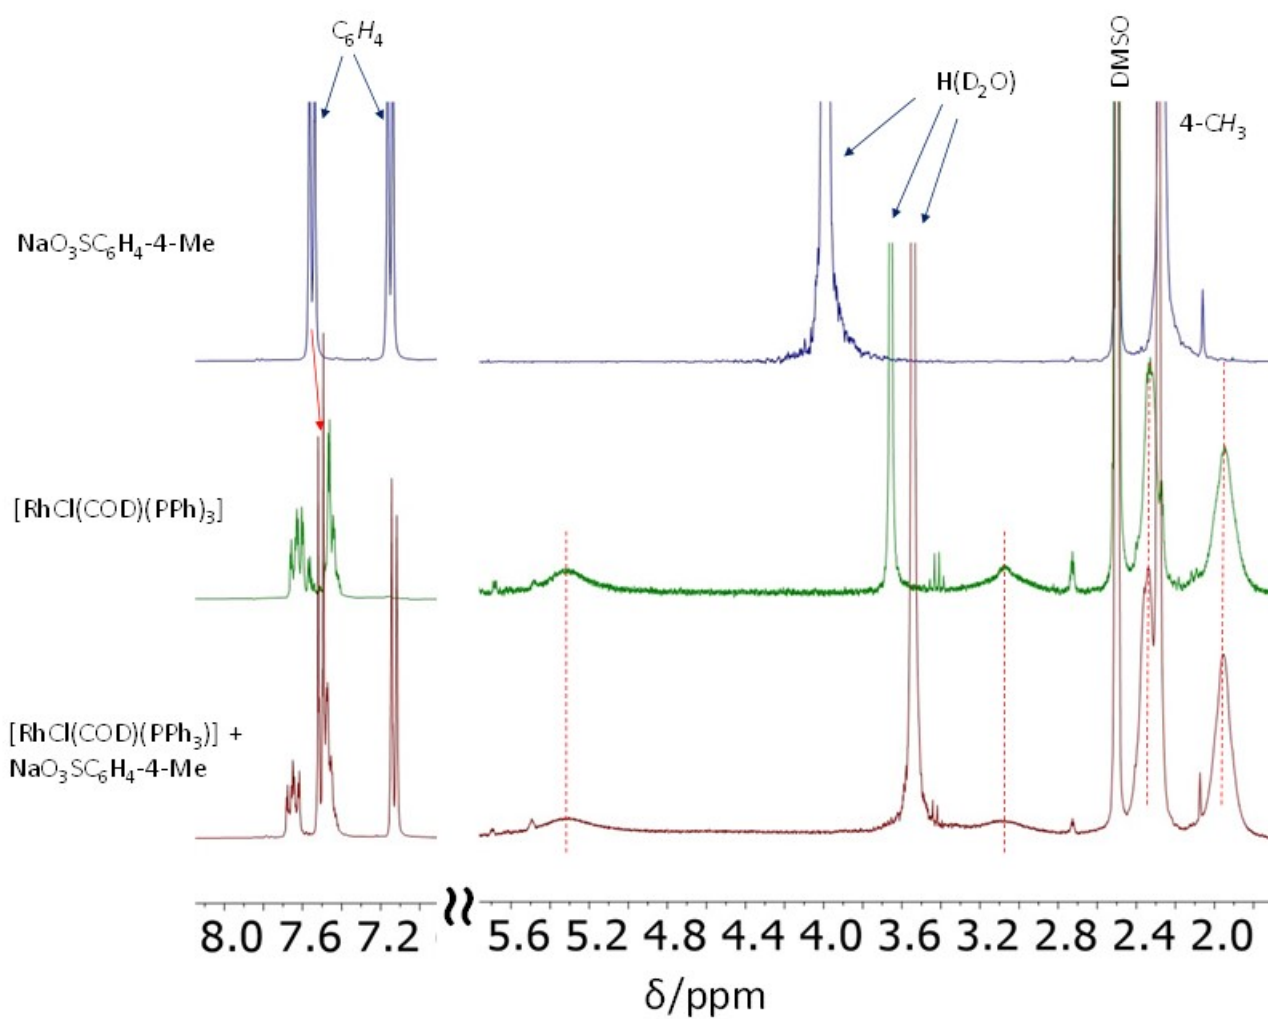

**Figure S 21.**  $^1\text{H}$  NMR spectrum in DMSO- $d_6$ /D $_2$ O (4:1 v/v) of the  $[\text{RhCl}(\text{COD})(\text{PPh}_3)]/\text{NaO}_3\text{SC}_6\text{H}_4\text{-4-CH}_3$  mixture (Rh/sulfonate = ca. 1:5), in comparison with those of the separate reagents measured under the same conditions.

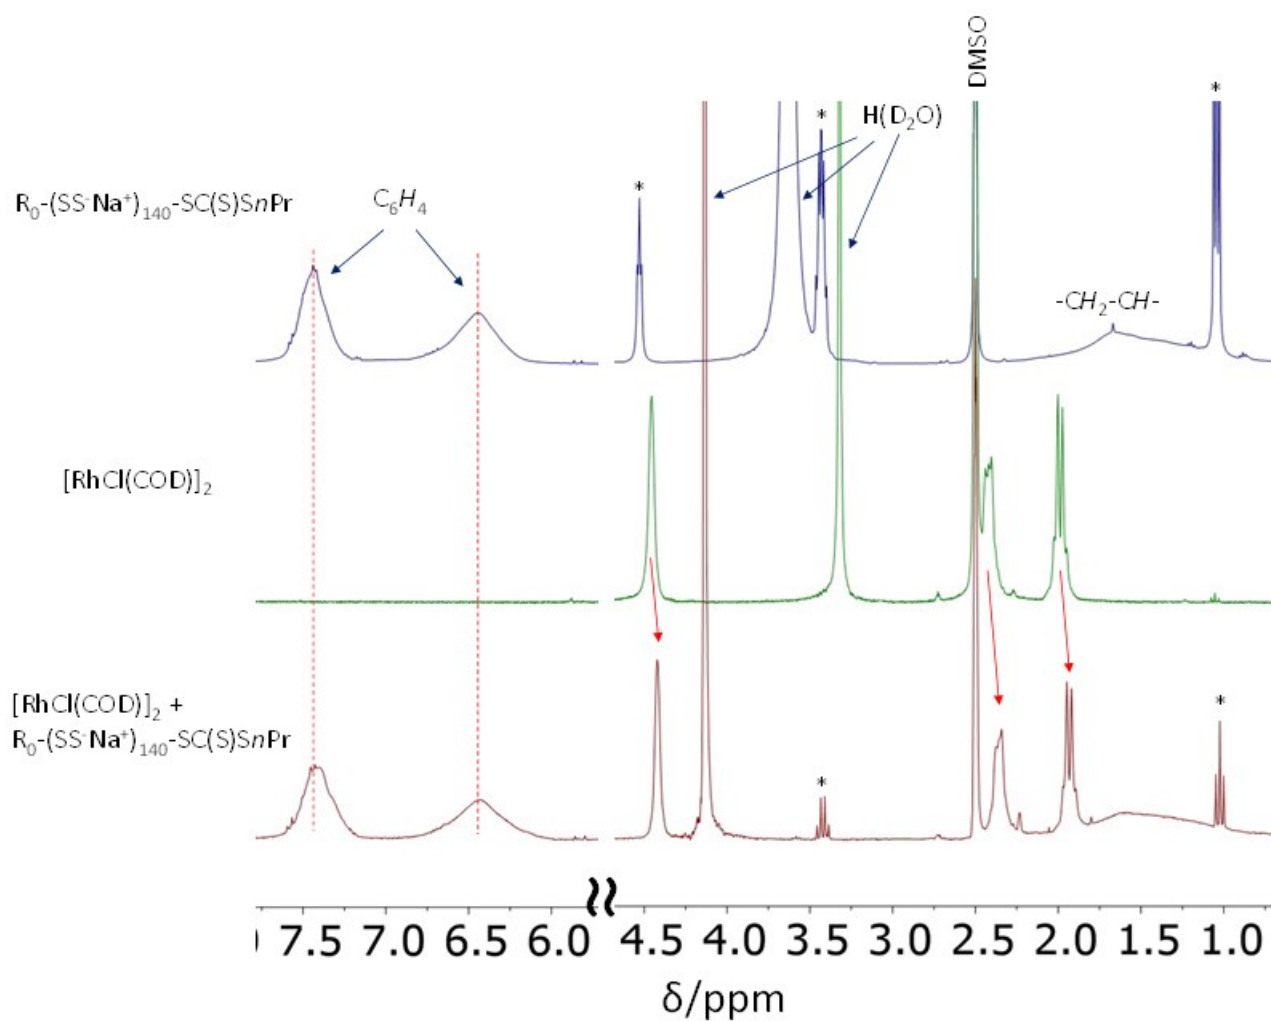

**Figure S 22.**  $^1\text{H}$  NMR spectrum in DMSO- $d_6$ /D $_2$ O (6:1 v/v) of the  $[\text{RhCl}(\text{COD})]_2/\text{R}_0-(\text{SS}^-\text{Na}^+)_{140}-\text{SC}(\text{S})\text{SnPr}$  mixture (Rh/sulfonate = ca. 1:5), in comparison with those of the separate reagents measured under the same conditions. The starred resonances below to the residual ethanol in the macroRAFT polymer sample.

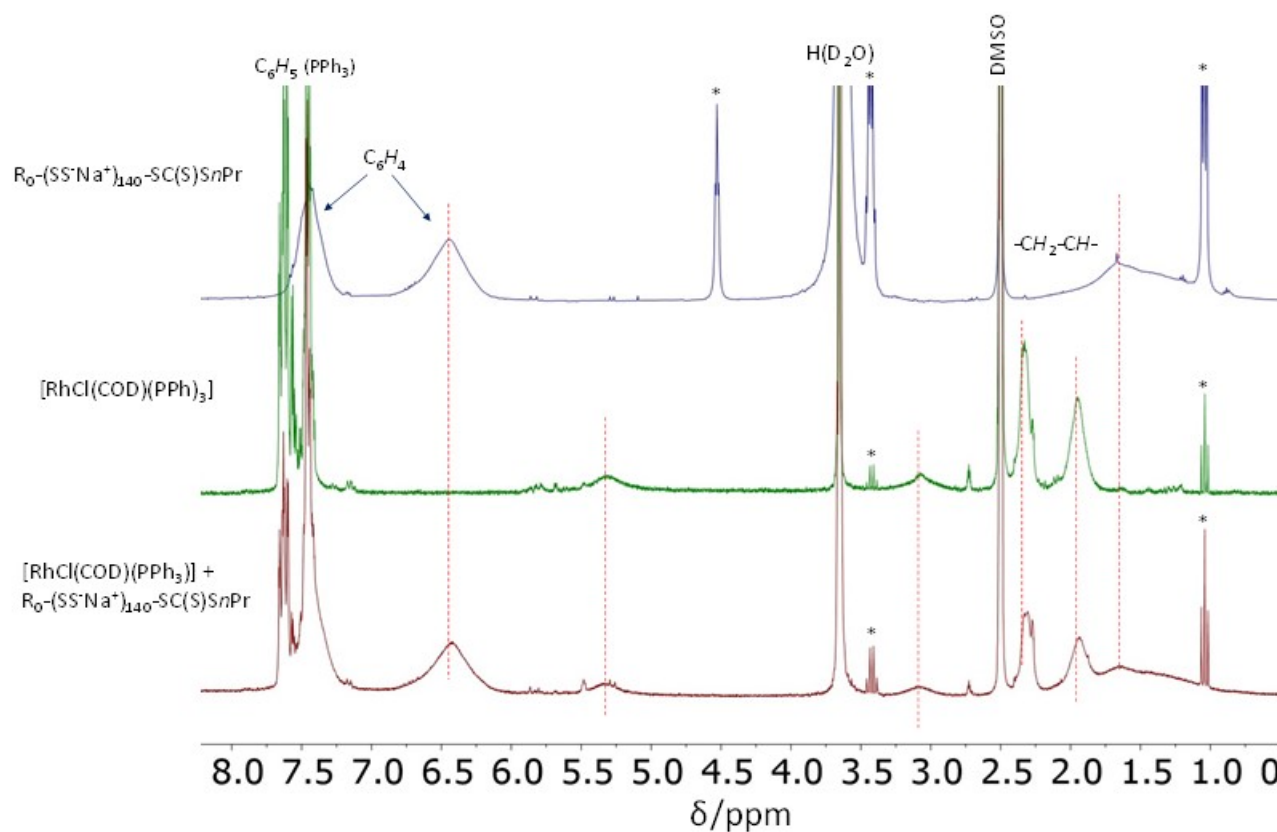

**Figure S 23.**  $^1\text{H}$  NMR spectrum in  $\text{DMSO-}d_6/\text{D}_2\text{O}$  (6:1 v/v) of the  $[\text{RhCl(COD)(PPh}_3)]/\text{R}_0\text{-(SS}^-\text{Na}^+)_{140}\text{-SC(S)SnPr}$  mixture ( $\text{Rh/sulfonate} = \text{ca. } 1:5$ ), in comparison with those of the separate reagents measured under the same conditions. The starred resonances below to the residual ethanol in the macroRAFT polymer sample.

(c) TPP-functionalized CCMs and NGs with P(SS<sup>-</sup>Na<sup>+</sup>-*co*-PEOMA) copolymer blocks in the hydrophilic shell

**Table S 2.** List of all polymers with a P(SS<sup>-</sup>Na<sup>+</sup>-*co*-PEOMA) shell synthesized in this study and reference to their characterization.

| Formula <sup>a</sup>                                                                                                                                                                                                                                                                                 | SEC         | <sup>1</sup> H NMR         | <sup>31</sup> P NMR      | DLS                        | TEM         | ζ (mV)    | Ref.           |
|------------------------------------------------------------------------------------------------------------------------------------------------------------------------------------------------------------------------------------------------------------------------------------------------------|-------------|----------------------------|--------------------------|----------------------------|-------------|-----------|----------------|
| <b>1. Hydrosoluble R<sub>0</sub>-(SS<sup>-</sup>Na<sup>+</sup><sub>0.2</sub>-<i>co</i>-PEOMA<sub>0.8</sub>)<sub>x</sub>-SC(S)SPr macroRAFT agents</b>                                                                                                                                                |             |                            |                          |                            |             |           |                |
| R <sub>0</sub> -[(SS <sup>-</sup> Na <sup>+</sup> ) <sub>0.2</sub> - <i>co</i> -PEOMA <sub>0.8</sub> ] <sub>50</sub> -SC(S)SnPr                                                                                                                                                                      | Figure S 25 | Figure S 24<br>Figure S 27 |                          | Figure S 26                | Figure S 26 | /         | HW617          |
| R <sub>0</sub> -[(SS <sup>-</sup> Na <sup>+</sup> ) <sub>0.2</sub> - <i>co</i> -PEOMA <sub>0.8</sub> ] <sub>140</sub> -SC(S)SnPr                                                                                                                                                                     | /           | Figure S 24<br>Figure S 27 |                          | Figure S 26                | Figure S 26 | /         | HW627          |
| <b>2. Diblock P(SS<sup>-</sup>Na<sup>+</sup>-<i>co</i>-PEOMA)-<i>b</i>-St<sub>50</sub> macroRAFT agents</b>                                                                                                                                                                                          |             |                            |                          |                            |             |           |                |
| R <sub>0</sub> -[(SS <sup>-</sup> Na <sup>+</sup> ) <sub>0.2</sub> - <i>co</i> -PEOMA <sub>0.8</sub> ] <sub>50</sub> - <i>b</i> -St <sub>50</sub> -SC(S)SnPr                                                                                                                                         | /           | /                          |                          | Figure S 28                | Figure S 28 | /         | HW688          |
| R <sub>0</sub> -[(SS <sup>-</sup> Na <sup>+</sup> ) <sub>0.2</sub> - <i>co</i> -PEOMA <sub>0.8</sub> ] <sub>140</sub> - <i>b</i> -St <sub>50</sub> -SC(S)SnPr                                                                                                                                        | /           | /                          |                          | Figure S 28                | Figure S 28 | /         | HW691          |
| <b>3. Diblock P(SS<sup>-</sup>Na<sup>+</sup>-<i>co</i>-PEOMA)-<i>b</i>-P(St-<i>co</i>-DPPS) micelles</b>                                                                                                                                                                                             |             |                            |                          |                            |             |           |                |
| R <sub>0</sub> -[(SS <sup>-</sup> Na <sup>+</sup> ) <sub>0.2</sub> - <i>co</i> -PEOMA <sub>0.8</sub> ] <sub>50</sub> - <i>b</i> -(St <sub>0.9</sub> - <i>co</i> -DPPS <sub>0.1</sub> ) <sub>300</sub> -SC(S)SnPr                                                                                     | /           | Figure S 29                | Figure S 29              | Figure S 30<br>Figure S 35 | Figure S 30 | /         | HW618H<br>W701 |
| R <sub>0</sub> -[(SS <sup>-</sup> Na <sup>+</sup> ) <sub>0.2</sub> - <i>co</i> -PEOMA <sub>0.8</sub> ] <sub>140</sub> - <i>b</i> -(St <sub>0.9</sub> - <i>co</i> -DPPS <sub>0.1</sub> ) <sub>300</sub> -SC(S)SnPr                                                                                    |             | Figure S 29                | Figure S 29              | /                          | /           | /         | HW629          |
| <b>4. CCMs with a P(SS<sup>-</sup>Na<sup>+</sup>-<i>co</i>-PEOMA) shell and a mixed DEGDMA-<i>co</i>-St core</b>                                                                                                                                                                                     |             |                            |                          |                            |             |           |                |
| R <sub>0</sub> -[(SS <sup>-</sup> Na <sup>+</sup> ) <sub>0.2</sub> - <i>co</i> -PEOMA <sub>0.8</sub> ] <sub>50</sub> - <i>b</i> -(St <sub>0.9</sub> - <i>co</i> -DPPS <sub>0.1</sub> ) <sub>300</sub> - <i>b</i> -(St <sub>0.9</sub> - <i>co</i> -DEGDMA <sub>0.1</sub> ) <sub>150</sub> -SC(S)SnPr  | /           | Figure S 31                | Figure S 31              | Figure 10<br>Figure S 35   | Figure 10   | /         | HW625          |
| R <sub>0</sub> -[(SS <sup>-</sup> Na <sup>+</sup> ) <sub>0.2</sub> - <i>co</i> -PEOMA <sub>0.8</sub> ] <sub>140</sub> - <i>b</i> -(St <sub>0.9</sub> - <i>co</i> -DPPS <sub>0.1</sub> ) <sub>300</sub> - <i>b</i> -(St <sub>0.9</sub> - <i>co</i> -DEGDMA <sub>0.1</sub> ) <sub>150</sub> -SC(S)SnPr | /           | Figure S 31                | Figure S 31              | Figure 10                  | Figure 10   | /         | HW632          |
| <b>5. CCM with P(PEOMA-<i>co</i>-SS<sup>-</sup>Na<sup>+</sup>) shell and neat DEGDMA core</b>                                                                                                                                                                                                        |             |                            |                          |                            |             |           |                |
| R <sub>0</sub> -(PSS <sup>-</sup> Na <sup>+</sup> <sub>0.2</sub> - <i>co</i> -PEOMA <sub>0.8</sub> ) <sub>50</sub> - <i>b</i> -(St <sub>0.9</sub> - <i>co</i> -DPPS <sub>0.1</sub> ) <sub>300</sub> - <i>b</i> -DEGDMA <sub>90</sub> -SC(S)SPr                                                       | /           | Figure S 32                | Figure S 32<br>Figure 11 | Figure 10                  | Figure 10   | -25.9±4,5 | HW620H<br>W657 |
| <b>6. NG with P(PEOMA-<i>co</i>-SS<sup>-</sup>Na<sup>+</sup>) shell</b>                                                                                                                                                                                                                              |             |                            |                          |                            |             |           |                |
| R <sub>0</sub> -[(SS <sup>-</sup> Na <sup>+</sup> ) <sub>0.2</sub> - <i>co</i> -PEOMA <sub>0.8</sub> ] <sub>50</sub> - <i>b</i> -St <sub>50</sub> - <i>b</i> -(St <sub>425</sub> - <i>co</i> -DPPS <sub>30</sub> - <i>co</i> -DEGDMA <sub>15</sub> )-SC(S)SnPr                                       | /           | Figure S 33                | Figure S 33              | Figure S 34                | Figure S 34 | /         | HW698          |
| R <sub>0</sub> -[(SS <sup>-</sup> Na <sup>+</sup> ) <sub>0.2</sub> - <i>co</i> -PEOMA <sub>0.8</sub> ] <sub>140</sub> - <i>b</i> -St <sub>50</sub> - <i>b</i> -(St <sub>425</sub> - <i>co</i> -DPPS <sub>30</sub> - <i>co</i> -DEGDMA <sub>15</sub> )-SC(S)SnPr                                      | /           | Figure S 33                | Figure S 33              | Figure S 34                | Figure S 34 | /         | HW692          |

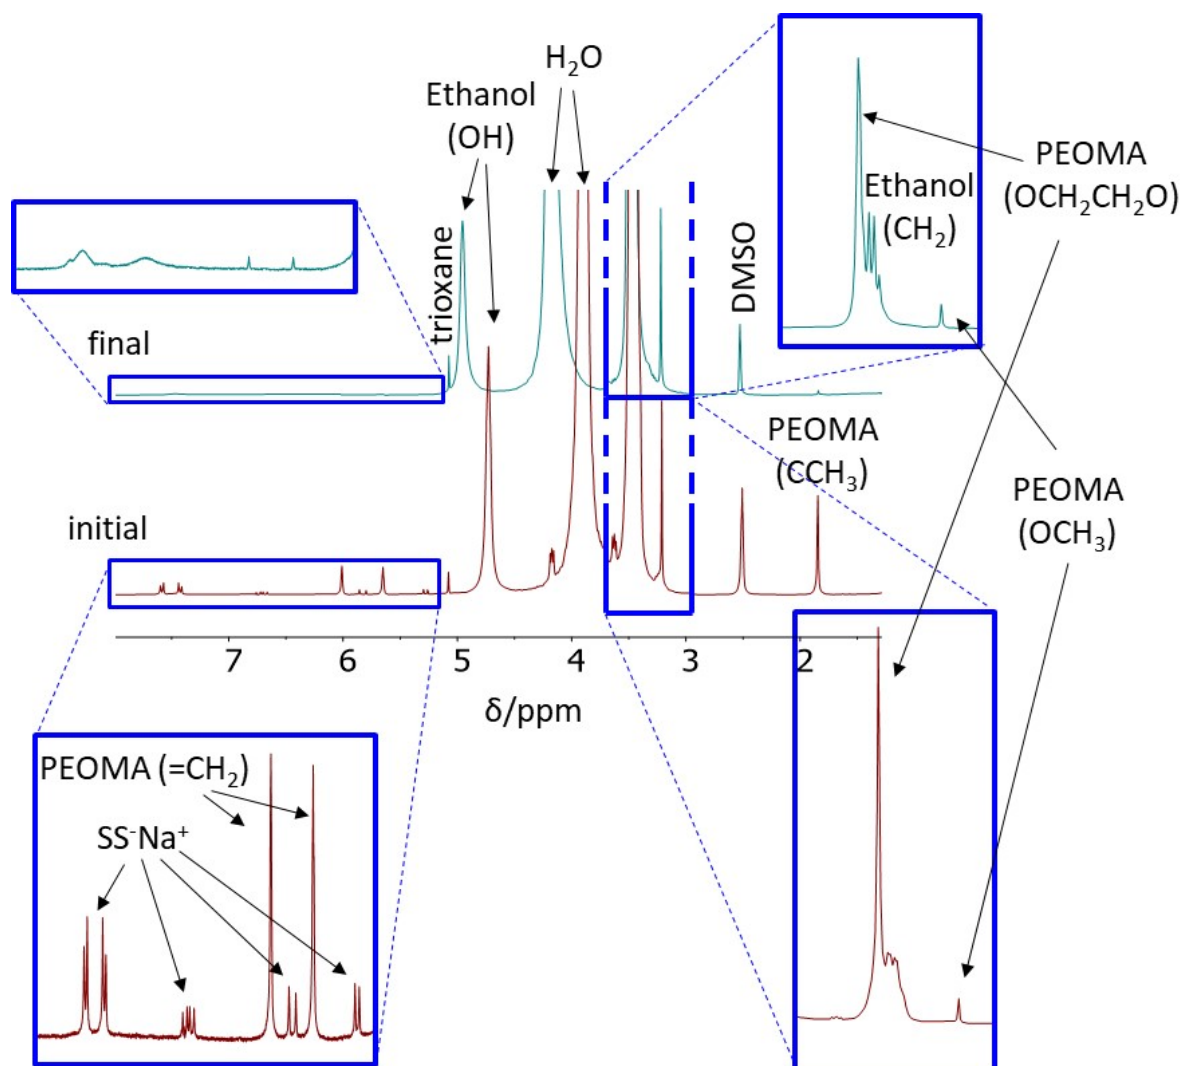

**Figure S 24.**  $^1\text{H}$  NMR monitoring of the  $\text{SS-Na}^+/\text{PEOMA}$  copolymerization for the synthesis of the  $\text{R}_0\text{-}[(\text{SS-Na}^+)_{0.2}\text{-co-PEOMA}_{0.8}]_{140}\text{-SC(S)SnPr}$  macroRAFT agents. All NMR samples were prepared by adding a drop of the reaction mixture directly to the  $\text{DMSO-}d_6$  solvent in the NMR tube.



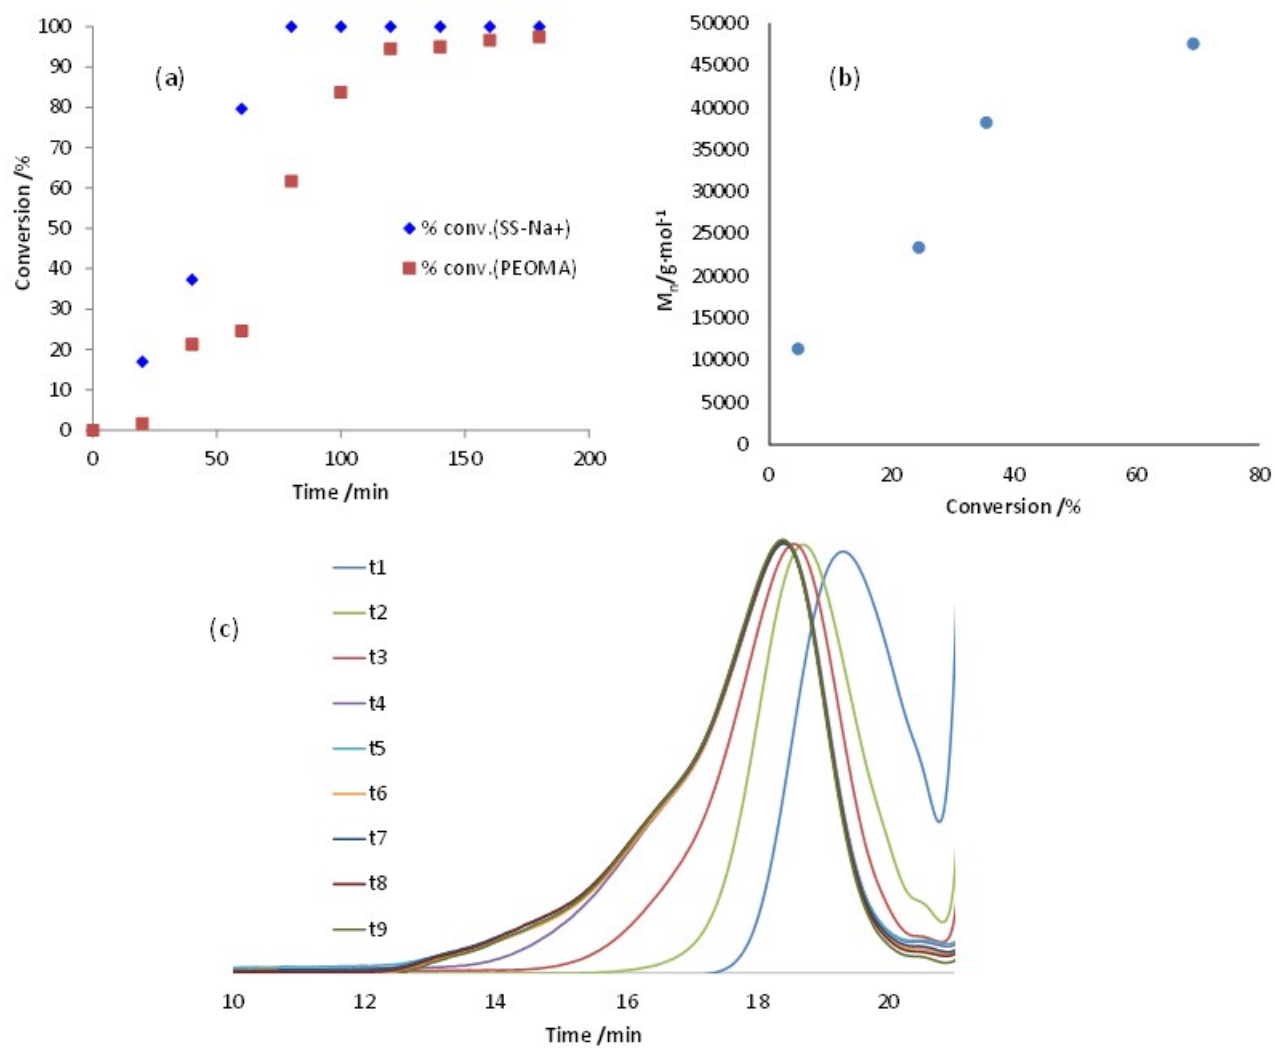

**Figure S 25.** <sup>1</sup>H NMR and SEC monitoring of the SS-Na<sup>+</sup>/PEOMA RAFT copolymerization: (a) individual monomer conversion vs. time; (b) evolution of the polymer molar mass with the global monomer conversion (c) GPC traces.

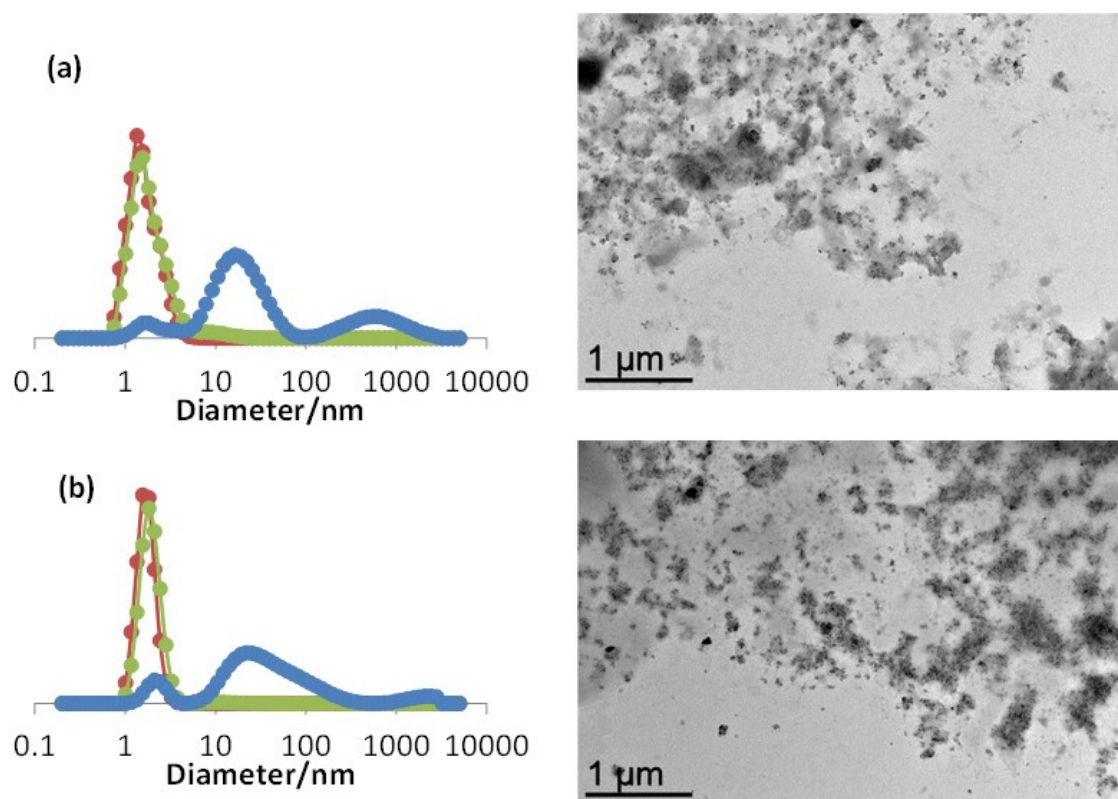

**Figure S 26.** DLS (left, unfiltered) and TEM (right) characterization of  $R_0-[(SS-Na^+)_{0.2}\text{-}co\text{-}PEOMA_{0.8}]_x\text{-SC(S)SnPr}$ . (a)  $x = 50$ ; (b)  $x = 140$ . Color coding for the DLS size distributions: number (red), volume (green) and intensity (blue).

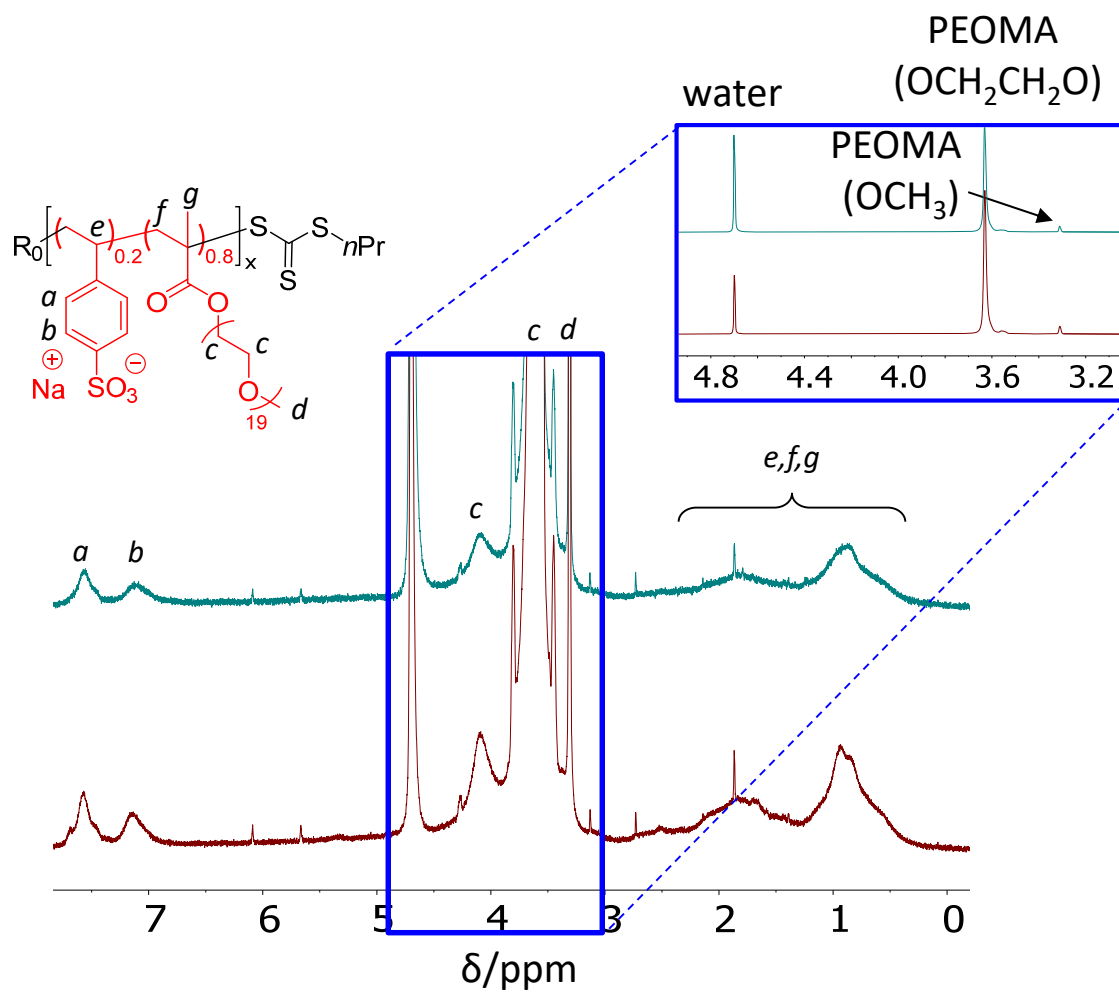

**Figure S 27.** <sup>1</sup>H NMR spectra of R<sub>0</sub>-[(SS-Na<sup>+</sup>)<sub>0.2</sub>-co-PEOMA<sub>0.8</sub>]<sub>x</sub>-SC(S)SnPr. (a) x = 50 (red); (b) x = 140 (cyan) in D<sub>2</sub>O.

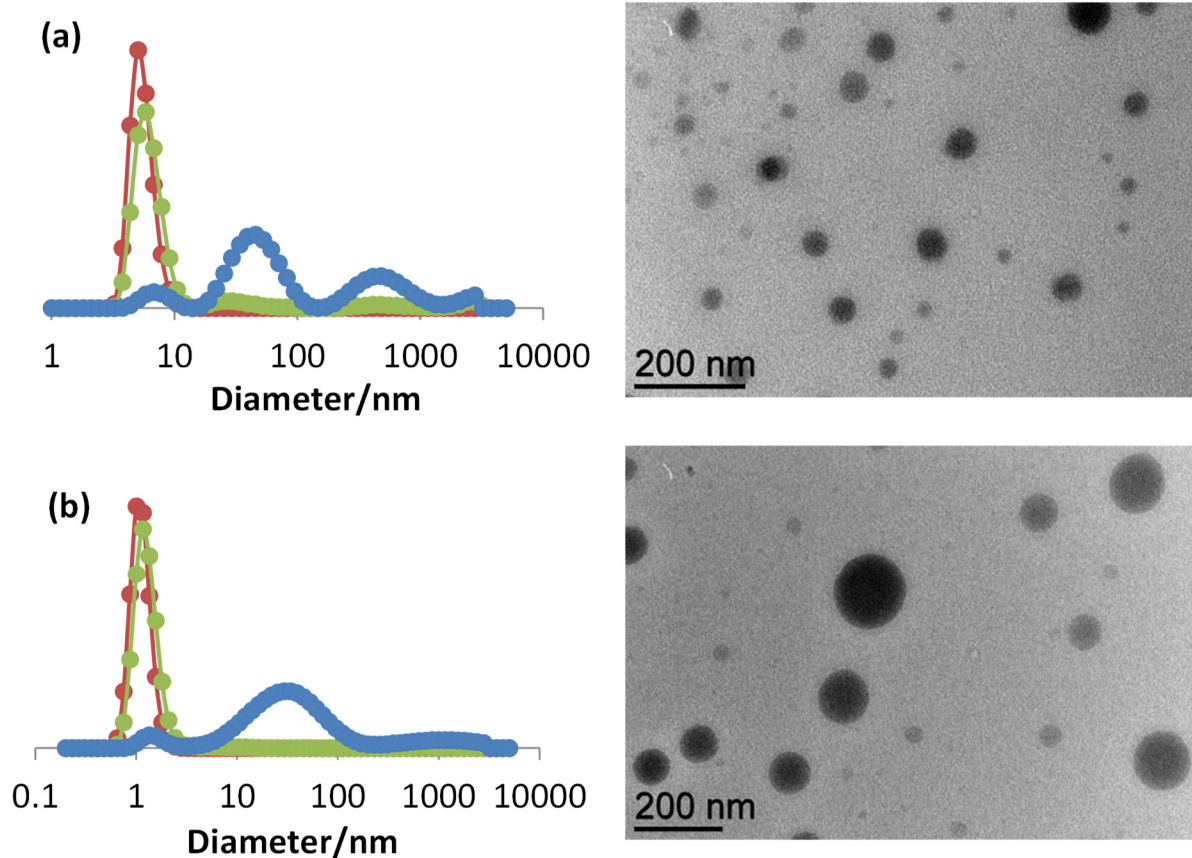

**Figure S 28.** DLS (left, unfiltered) and TEM (right) characterization of  $R_0-[(SS^-Na^+)_{0.2}\text{-}co\text{-}PEOMA_{0.8}]_x\text{-}b\text{-}St_{50}\text{-}SC(S)SnPr$ . (a)  $x = 50$ ; (b)  $x = 140$ . Color coding for the DLS size distributions: number (red), volume (green) and intensity (blue).

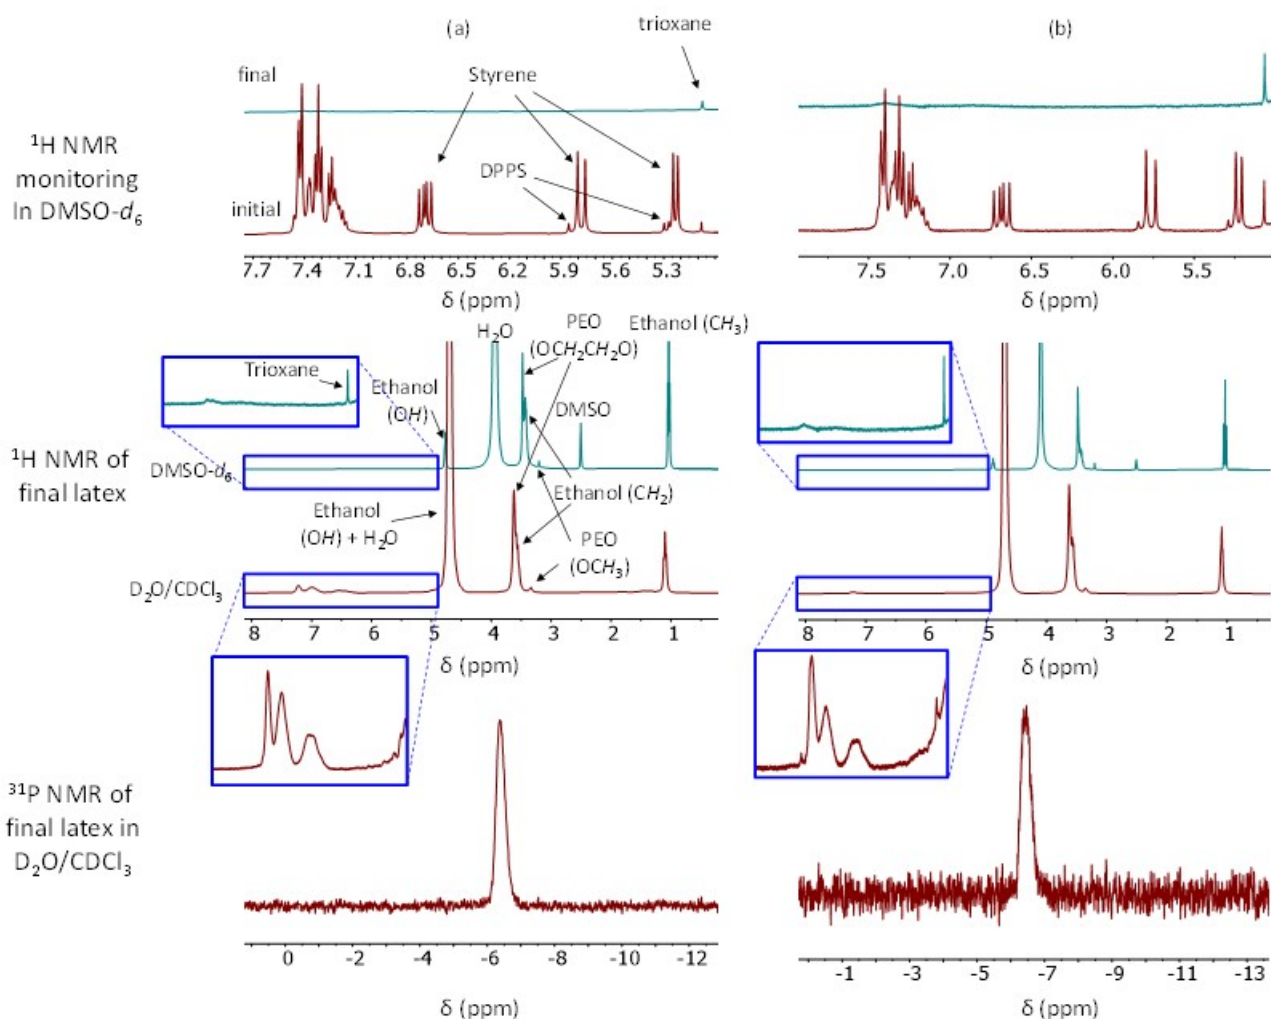

**Figure S 29.** NMR data for the synthesis of the  $R_0-[(SS^+Na^+)_{0.2-co-PEOMA_{0.8}}]_x-b-(St_{0.9-co-DPPS_{0.1}})_{300}-SC(S)SnPr$  diblock copolymer. (a)  $x = 50$ ; (b)  $x = 140$ . All NMR samples were prepared by adding a drop of the reaction mixture directly to the deuterated solvent or solvent mixture in the NMR tube.

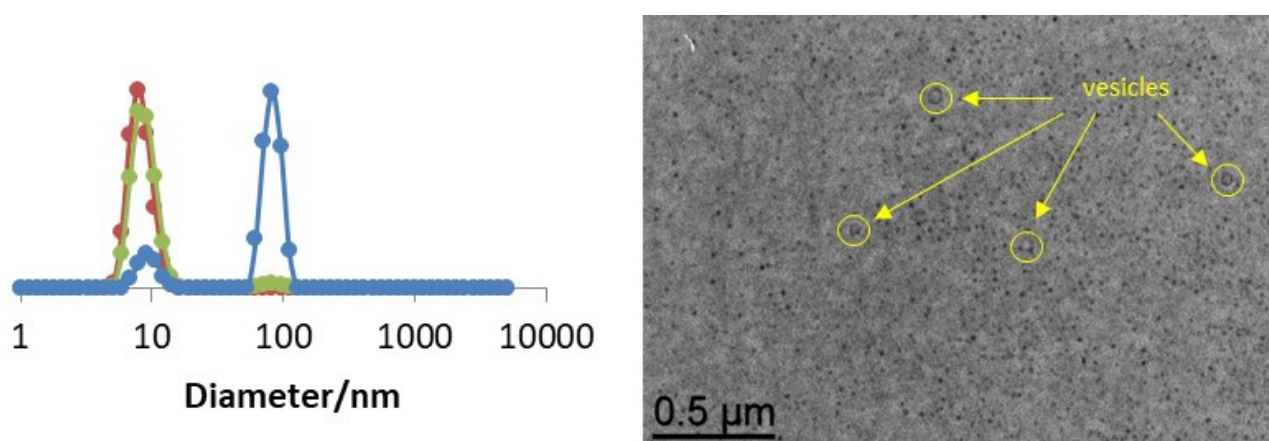

**Figure S 30.** DLS (left, unfiltered) and TEM (right) characterization of  $R_0-[(SS^+Na^+)_{0.2-co-PEOMA_{0.8}}]_{50}-b-(St_{0.9-co-DPPS_{0.1}})_{300}-SC(S)SnPr$ . Color coding for the DLS size distributions: number (red), volume (green) and intensity (blue).

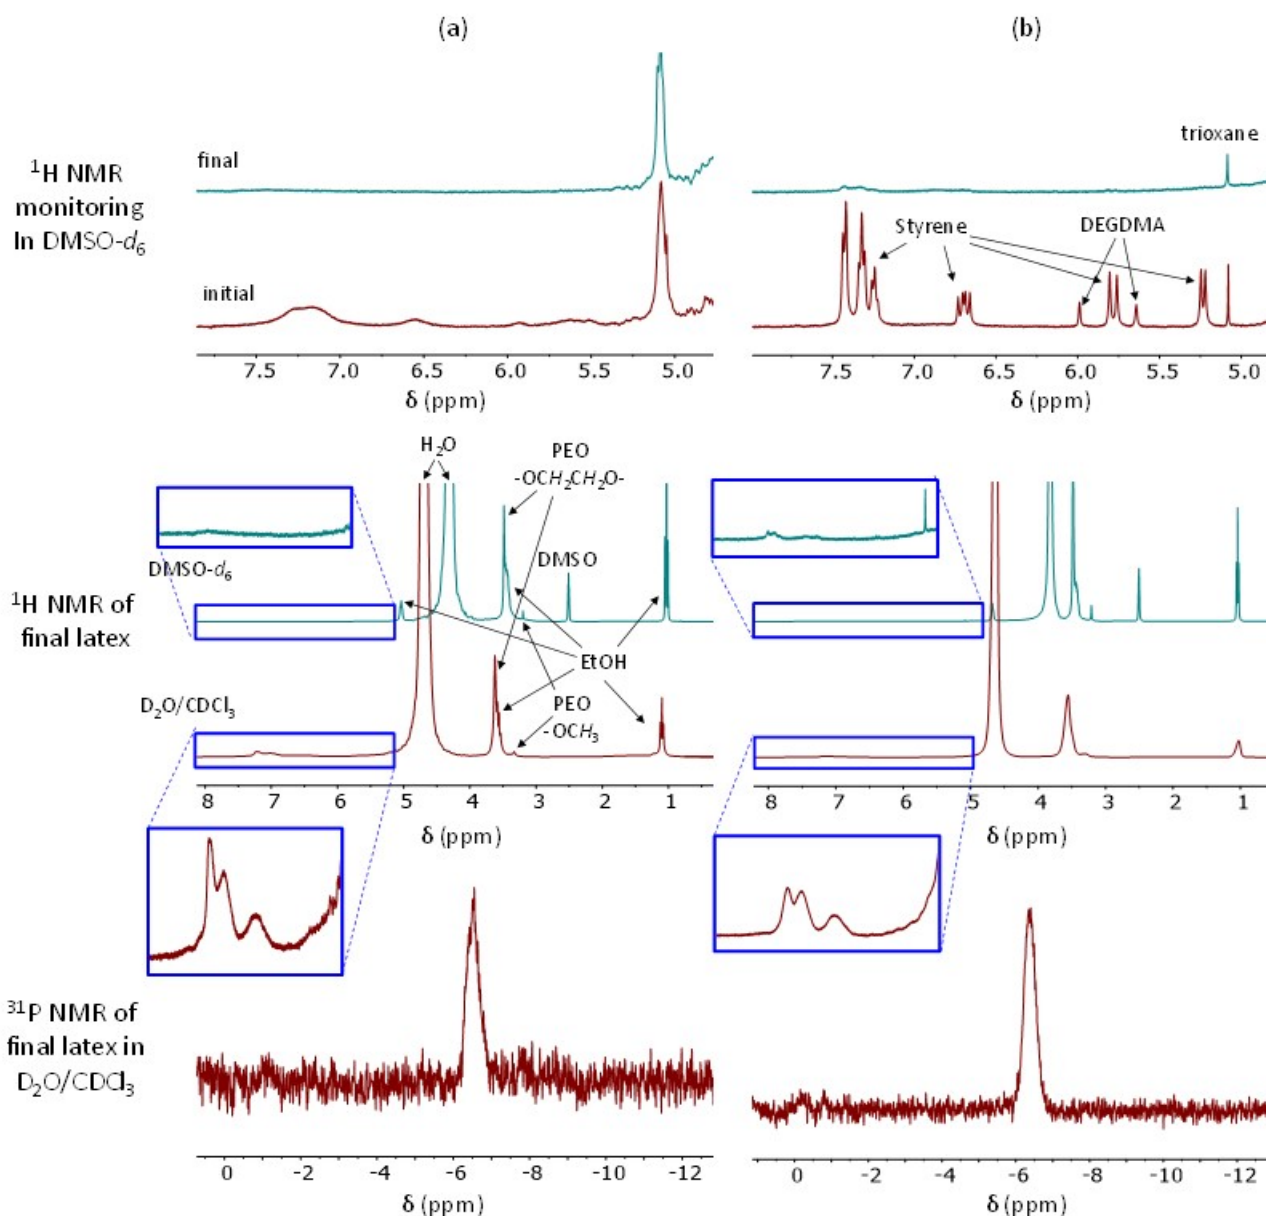

**Figure S 31.** NMR data for the synthesis of the  $R_0-[(SS^{\cdot-}Na^+)_{0.2}\text{-}co\text{-}PEOMA_{0.8}]_x\text{-}b\text{-}(St_{0.9}\text{-}co\text{-}DPPS_{0.1})_{300}\text{-}b\text{-}(St_{0.9}\text{-}co\text{-}DEGDMA_{0.1})_{150}\text{-}SC(S)SnPr$  CCMs. (a)  $x = 50$ ; (b)  $x = 140$ . All NMR samples were prepared by adding a drop of the reaction mixture directly to the deuterated solvent or solvent mixture in the NMR tube.



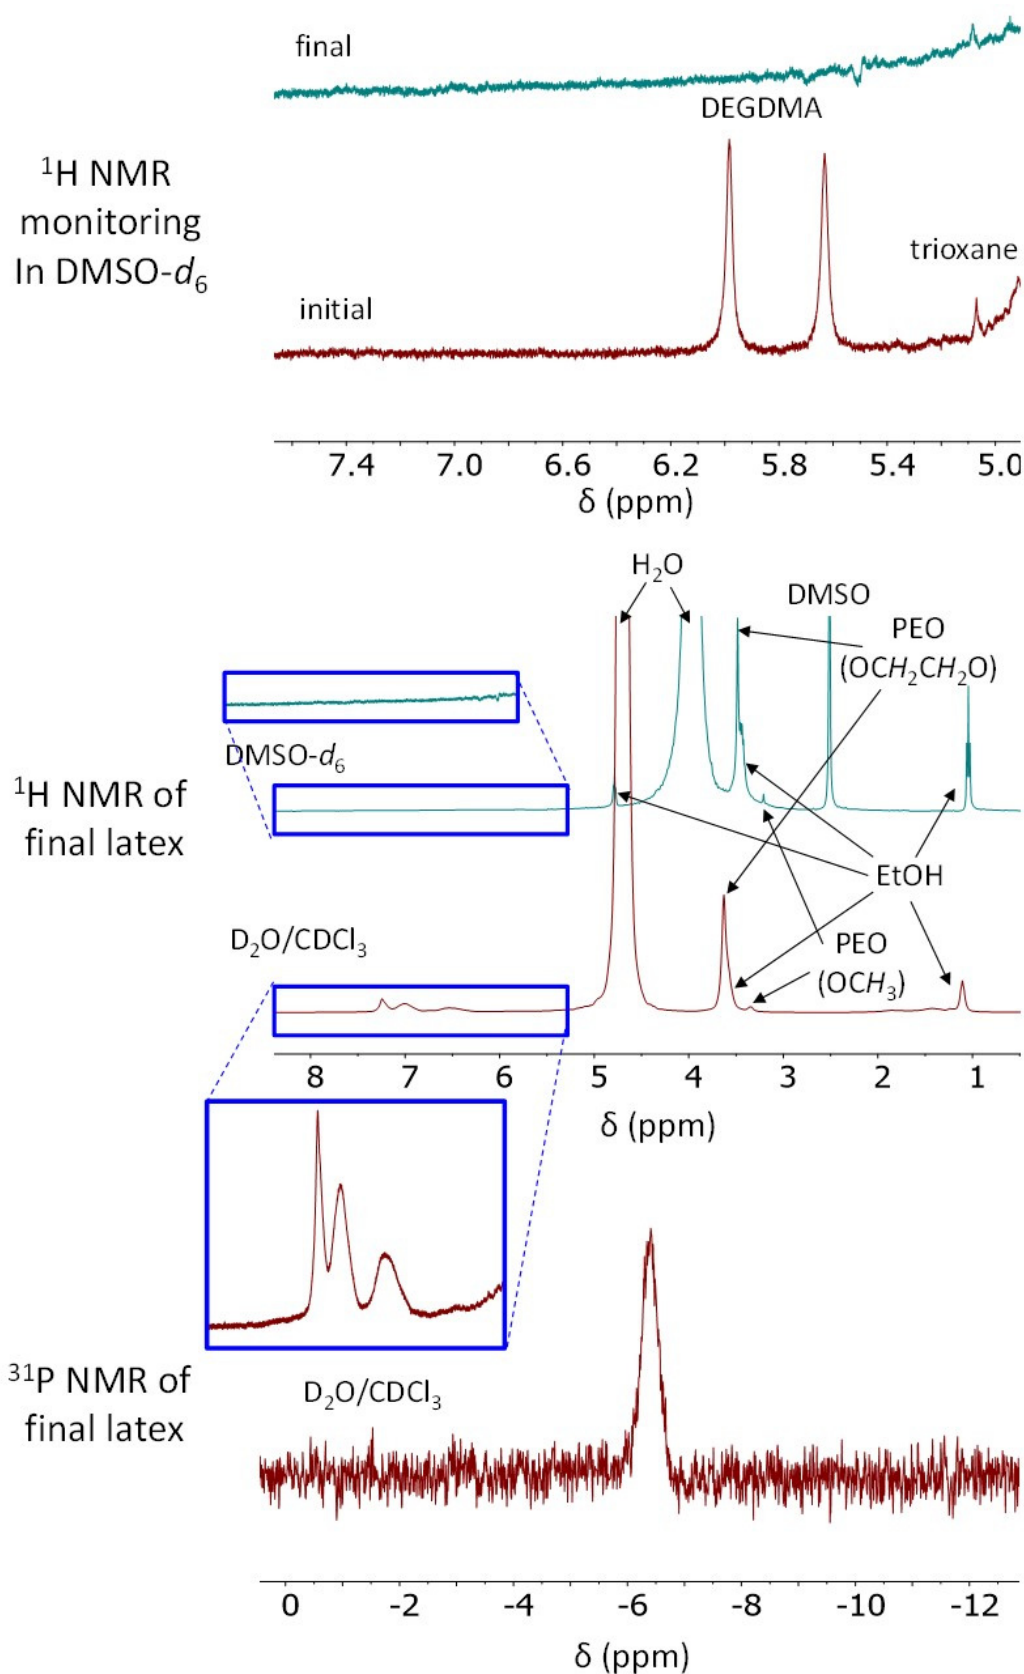

**Figure S 32.** NMR data for the synthesis of the  $\text{R}_0\text{-}[(\text{SS}^-\text{Na}^+)_{0.2}\text{-co-PEOMA}_{0.8}]_{50}\text{-b-(St}_{0.9}\text{-co-DPPS}_{0.1})_{300}\text{-b-DEGDMA}_{90}\text{-SC(S)SnPr}$  CCM. All NMR samples were prepared by adding a drop of the reaction mixture directly to the deuterated solvent or solvent mixture in the NMR tube.



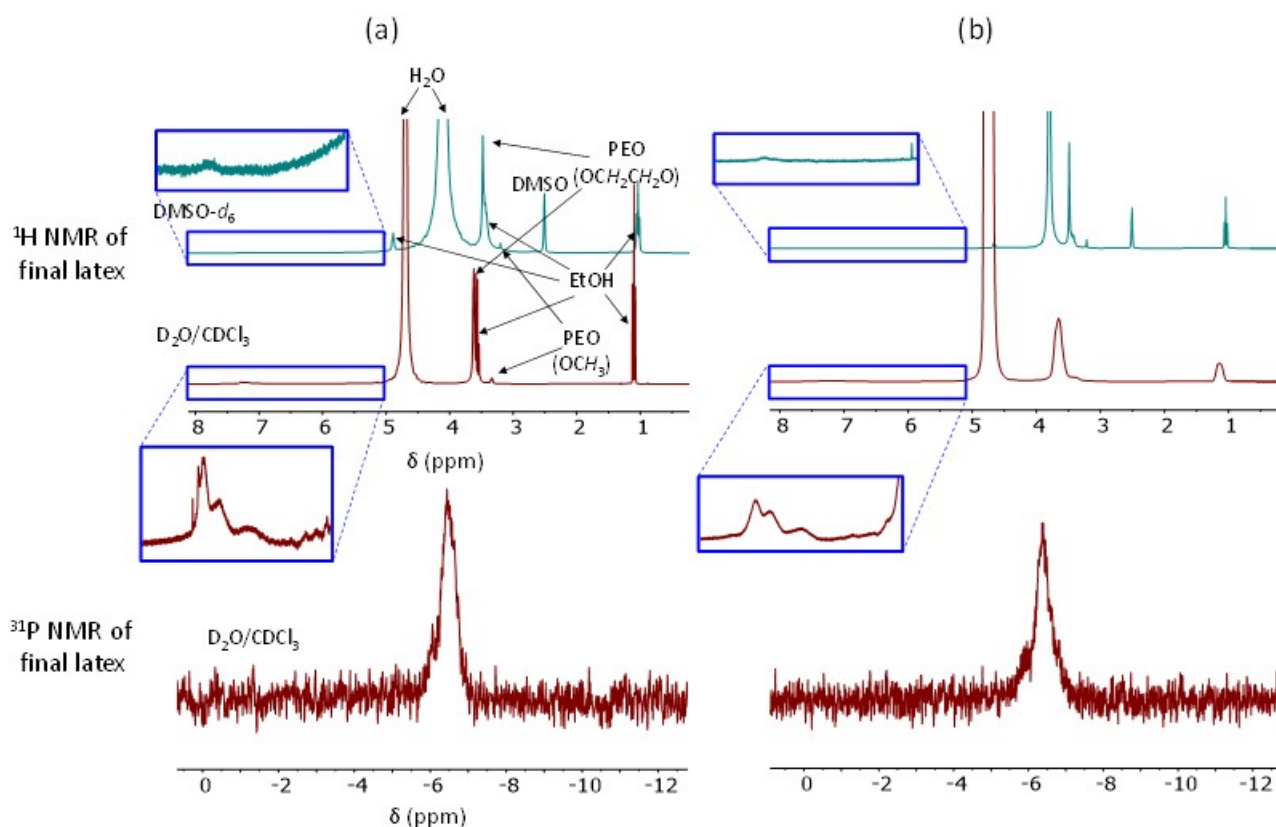

**Figure S 33.** NMR data for the synthesis of the  $R_0-[(SS^{Na^+})_{0.2}\text{-}co\text{-PEOMA}_{0.8}]_{50}\text{-}b\text{-St}_{50}\text{-}b\text{-}(\text{St}_{425}\text{-}co\text{-DPPS}_{30}\text{-}co\text{-DEGDMA}_{15})\text{-SC(S)SnPr}$  NGs. All NMR samples were prepared by adding a drop of the reaction mixture directly to the deuterated solvent or solvent mixture in the NMR tube.

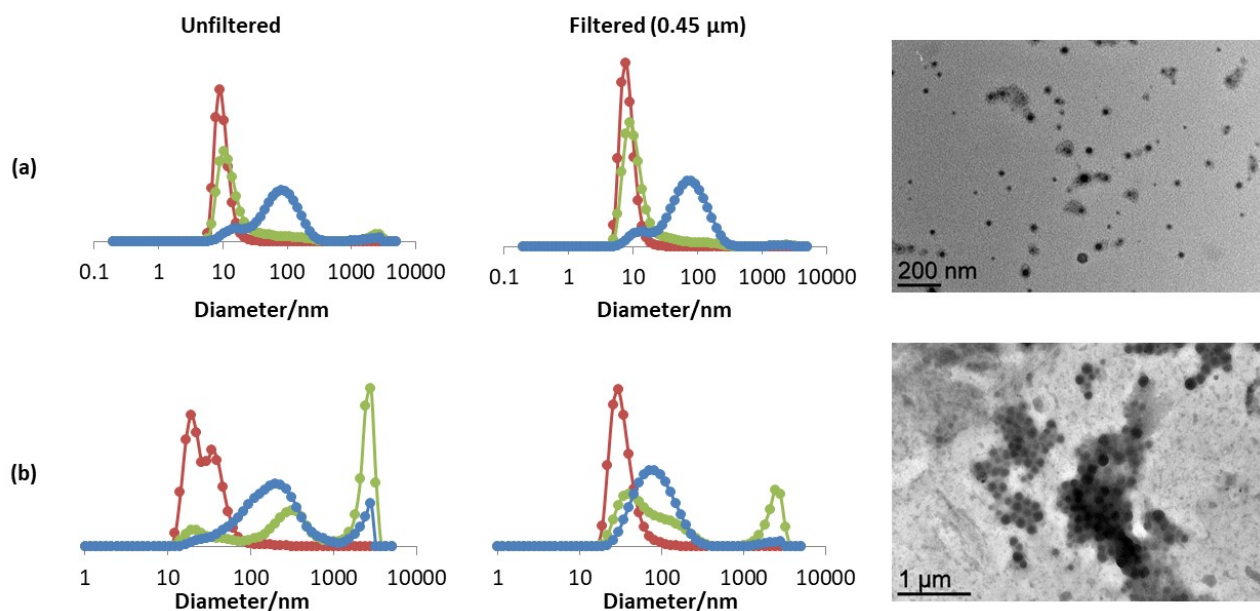

**Figure S 34.** DLS (left) and TEM (right) characterization of the  $R_0-[(SS^{Na^+})_{0.2}\text{-}co\text{-PEOMA}_{0.8}]_{50}\text{-}b\text{-St}_{50}\text{-}b\text{-}(\text{St}_{425}\text{-}co\text{-DPPS}_{30}\text{-}co\text{-DEGDMA}_{15})\text{-SC(S)SnPr}$  NGs. Color coding for the DLS size distributions: number (red), volume (green) and intensity (blue).

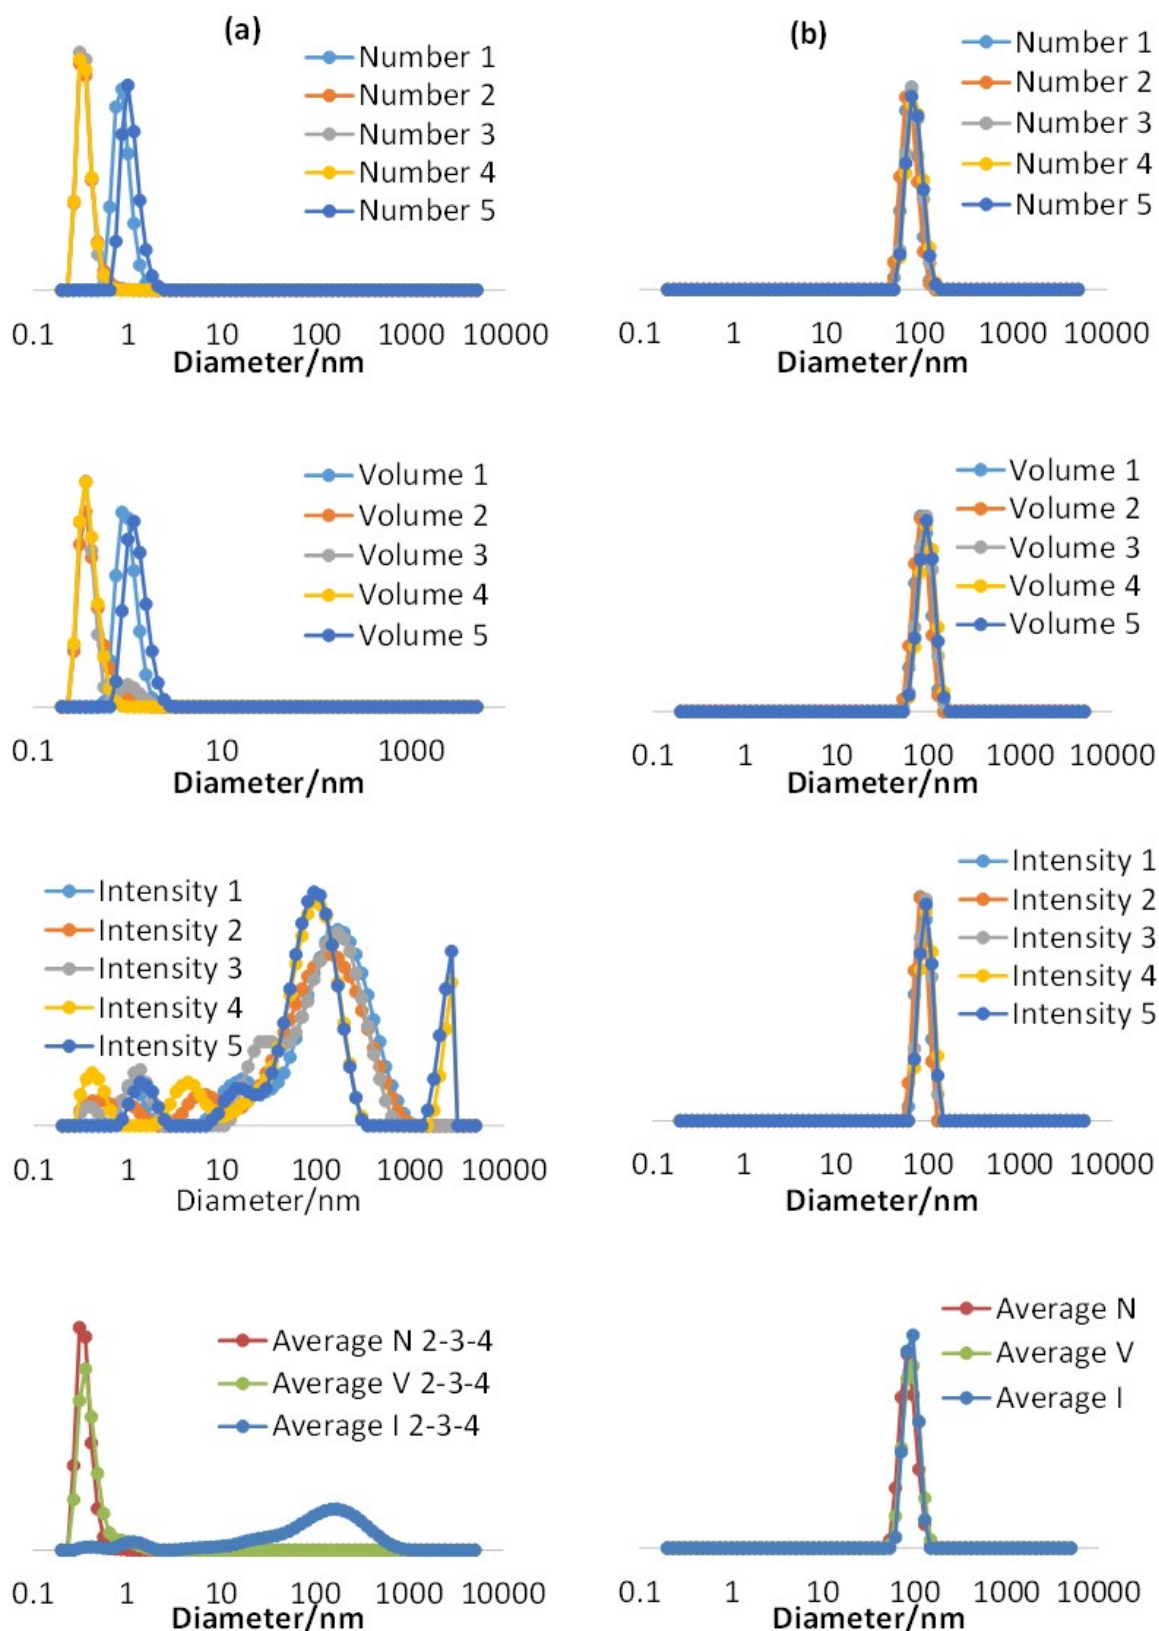

**Figure S 35.** DLS characterization of (a) the  $R_0$ -( $SS\text{-}Na^{+}_{0.2}\text{-co-PEOMA}_{0.8}$ ) $_{50}$ - $b$ -( $St_{0.9}\text{-co-DPPS}_{0.1}$ ) $_{300}$ -SC(S)SPr diblock copolymer and (b) the corresponding  $R_0$ -( $SS\text{-}Na^{+}_{0.2}\text{-co-PEOMA}_{0.8}$ ) $_{50}$ - $b$ -( $St_{0.9}\text{-co-DPPS}_{0.1}$ ) $_{300}$ - $b$ -( $St_{0.9}\text{-co-DEGDMA}_{0.1}$ ) $_{150}$ -SC(S)SPr CCM in a THF-water 60:40 mixed solvent. The dispersions were filtered through a 0.45  $\mu\text{m}$  pore filter and measurements were done in sequence on the same dispersion every 20 seconds.

**Table S 3.** Hydrogenation of neat styrene with the [RhCl(COD)(TPP)] precatalyst embedded in CCM nanoreactors.<sup>a</sup>

| Additive                                                                                                                                                                                                                                                         | Recycle | Conv./% | TON | [Rh]/ppm <sup>b</sup> |
|------------------------------------------------------------------------------------------------------------------------------------------------------------------------------------------------------------------------------------------------------------------|---------|---------|-----|-----------------------|
| R <sub>0</sub> -[(SS·Na <sup>+</sup> ) <sub>0.2-co</sub> -PEOMA <sub>0.8</sub> ] <sub>140</sub> -b-(St <sub>0.9-co</sub> -DPPS <sub>0.1</sub> ) <sub>300</sub> -b-(St <sub>0.9-co</sub> -DEGDMA <sub>0.1</sub> ) <sub>150</sub> -SC(S)SnPr<br>(Table 1, entry 1) | 0       | 29.4    | 588 | 6.1                   |
|                                                                                                                                                                                                                                                                  | 1       | 3.52    | 70  | 23.2                  |
|                                                                                                                                                                                                                                                                  | 2       | 7.09    | 142 | 22.0                  |
|                                                                                                                                                                                                                                                                  | 3       | 6.67    | 133 | 26.6                  |
|                                                                                                                                                                                                                                                                  | 4       | 6.12    | 122 | 23.7                  |
|                                                                                                                                                                                                                                                                  | 5       | 4.90    | 98  | 14.1                  |
|                                                                                                                                                                                                                                                                  | 6       | 8.09    | 162 | 13.5                  |
| R <sub>0</sub> -[(SS·Na <sup>+</sup> ) <sub>0.2-co</sub> -PEOMA <sub>0.8</sub> ] <sub>50</sub> -b-(St <sub>0.9-co</sub> -DPPS <sub>0.1</sub> ) <sub>300</sub> -b-DEGDMA <sub>90</sub> -SC(S)SnPr<br>(Table 1, entry 2)                                           | 0       | 26.3    | 526 | 2.4                   |
|                                                                                                                                                                                                                                                                  | 1       | 14.61   | 292 | 18.6                  |
|                                                                                                                                                                                                                                                                  | 2       | 4.56    | 91  | 1.5                   |
|                                                                                                                                                                                                                                                                  | 3       | 15.06   | 301 | 6.3                   |
|                                                                                                                                                                                                                                                                  | 4       | 14.46   | 289 | 24.0                  |
|                                                                                                                                                                                                                                                                  | 5       | 12.88   | 258 | 7.2                   |
| R <sub>0</sub> -[(SS·Na <sup>+</sup> ) <sub>0.2-co</sub> -PEOMA <sub>0.8</sub> ] <sub>140</sub> -b-St <sub>50</sub> -b-(St <sub>425-co</sub> -DPPS <sub>30-co</sub> -DEGDMA <sub>15</sub> )-SC(S)SnPr<br>(Table 1, entry 3)                                      | 0       | 41.9    | 837 | n.d.                  |
|                                                                                                                                                                                                                                                                  | 1       | 8.72    | 174 |                       |
|                                                                                                                                                                                                                                                                  | 2       | 6.72    | 134 |                       |
|                                                                                                                                                                                                                                                                  | 3       | 19.03   | 381 |                       |
|                                                                                                                                                                                                                                                                  | 4       | 3.47    | 69  |                       |
|                                                                                                                                                                                                                                                                  | 5       | 2.67    | 53  |                       |
|                                                                                                                                                                                                                                                                  | 6       | 3.31    | 66  |                       |

<sup>a</sup> Reaction conditions: styrene/Rh = 2000, P/Rh = 4, T = 25°C, p(H<sub>2</sub>) = 20 bar, stirring rate = 1200 rpm, reaction time: 2.5 h. <sup>b</sup> From the ICP-MS analysis of the recovered organic phase. n. d. = not determined.

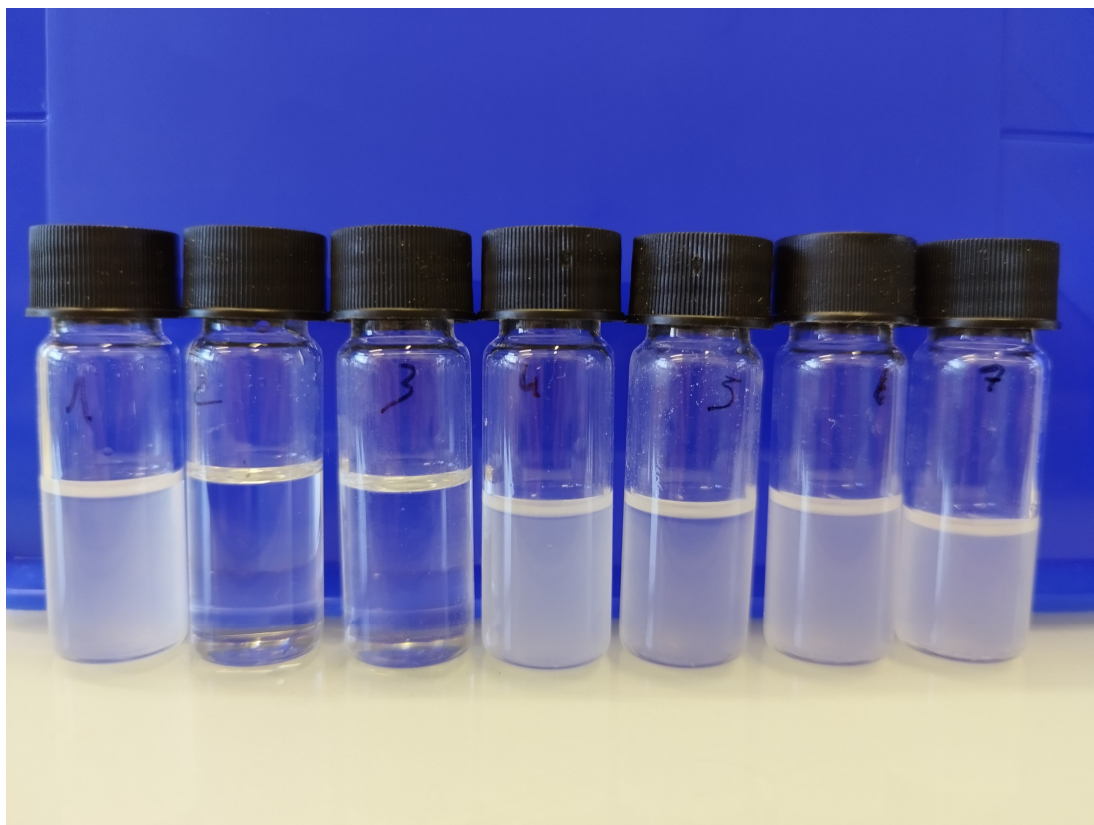

**Figure S 36.** Recovered reaction mixtures after the recycling runs of Table 1 (entry 1) and Figure 13 (a).

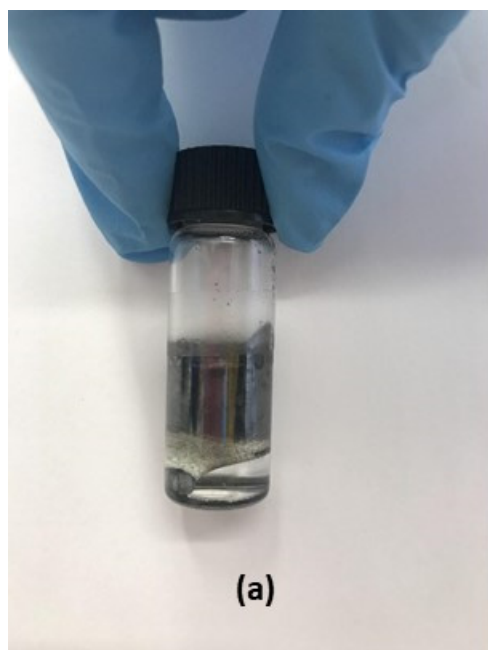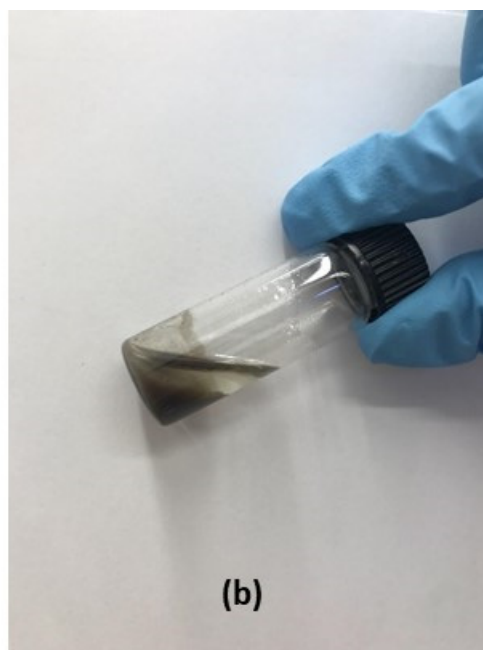

**Figure S 37.** Recovered reaction mixtures after the catalytic runs of Table 1. (a) Entry 6. (b) Entry 7.

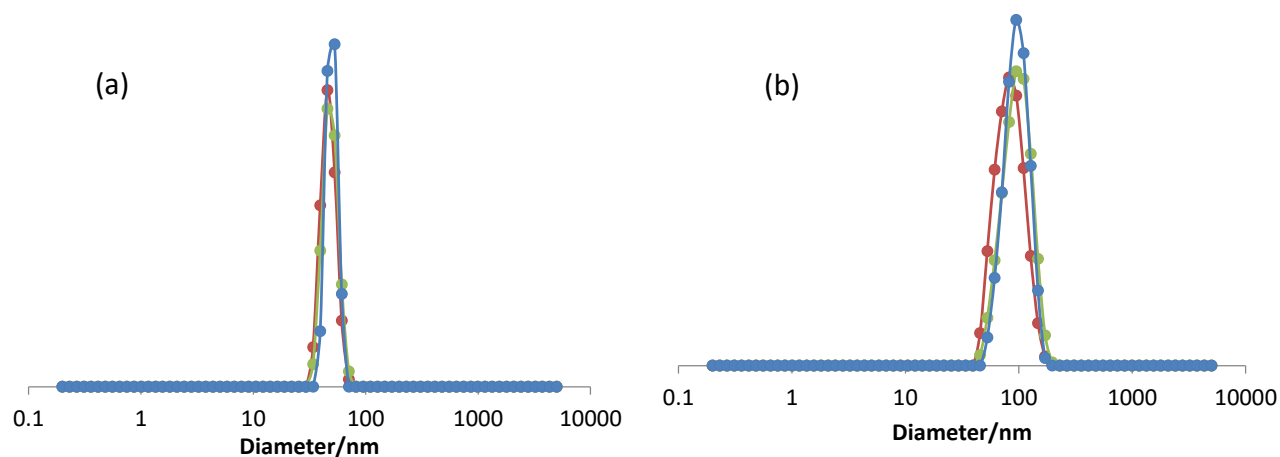

**Figure S 38.** DLS of the recovered organic phase from the recycling experiments of Table 1, measured after dilution in Et<sub>2</sub>O without filtration. (a) First recycle of entry 1. (b) First recycle of entry 2. Color coding for the DLS size distributions: number (red), volume (green) and intensity (blue).
